# Supplementary material for: Metal-dependent regioselective homocoupling of stannyl- and alkyl-substituted alkynes on group 4 elements. Formation of unsymmetrical titanacyclopentadienes and symmetrical zircona-cyclopentadienes
Source: Royal Society of Chemistry journal article supplement (doi:10.1039/c9dt02759a), 2019-01-01
Supplement: c9dt02759a1.pdf [file c9dt02759a1.pdf]

## Supporting Information

### **Metal-dependent regioselective homocoupling of stannyl- and alkyl-substituted alkynes on group 4 elements. Formation of unsymmetrical titanacyclopentadienes and symmetrical zirconacyclopentadienes.**

Masayoshi Bando,<sup>1</sup> Kiyohiko Nakajima,<sup>2</sup> Zhiyi Song<sup>1</sup> and Tamotsu Takahashi<sup>1\*</sup>

<sup>1</sup>Institute for Catalysis, Hokkaido University, Kita 21, Nishi 10, Sapporo 001-0021, Japan.

<sup>2</sup>Department of Chemistry, Aichi University of Education, Igaya, Kariya, Aichi 448-8542, Japan.

Correspondence to: tamotsu@cat.hokudai.ac.jp

|                                                                                                                                             |        |
|---------------------------------------------------------------------------------------------------------------------------------------------|--------|
| General Information                                                                                                                         | S2     |
| Preparation for Stannyl-substituted Alkyne <b>1a</b> and <b>1b</b> and Diyne <b>1c</b>                                                      | S3     |
| Synthesis of Titanacyclopentadiene <b>2a</b> , <b>2b</b> and <b>7c</b>                                                                      | S4     |
| Synthesis of Zirconacyclopentadiene <b>3a</b> , <b>3b</b> and <b>8a</b>                                                                     | S5     |
| <sup>1</sup> H NMR Monitoring Reaction of Alkyne <b>1a</b> with Cp <sub>2</sub> ZrBu <sub>2</sub> (Conversion of <b>8a</b> into <b>3a</b> ) | S6     |
| Reactions of Silyl-substituted Alkyne <b>4</b> with Cp <sub>2</sub> TiBu <sub>2</sub> (Formation of <b>5</b> and <b>6</b> )                 | S7     |
| X-ray Crystallographic Studies                                                                                                              | S8     |
| X-ray Structure of Complex <b>6</b> (Figure S1)                                                                                             | S9     |
| X-ray Crystallographic Data and Refinement Details for Complex <b>6</b> (Table S1)                                                          | S10    |
| NMR Spectra (Figure S2-39)                                                                                                                  | S11-32 |
| HRMS (Experimental Mass and Simulated Mass) (Figure S40-47)                                                                                 | S33-39 |
| Comparison of Bond Distances (Å) and Angles (°) of X-ray Structures (Figure S48).                                                           | S40    |

## Materials and Methods

### General Information.

All anaerobic and/or moisture sensitive manipulations were carried out with standard Schlenk techniques under predried nitrogen.  $^1\text{H}$  NMR (at 400 or 600 MHz) and  $^{13}\text{C}$  NMR (at 101 or 151 MHz) chemical shifts are reported in ppm downfield of internal tetramethylsilane or given relative to the respective residual solvent peaks ( $^1\text{H}$ :  $\text{CHCl}_3$  at 7.26,  $\text{C}_6\text{H}_6$  at 7.16,  $^{13}\text{C}$ :  $\text{CHCl}_3$  at 77.0,  $\text{C}_6\text{H}_6$  at 128.0). NMR yields were determined by using dichloromethane or mesitylene as internal standards. All yields were calculated according to the alkynes used in the formation of titanacyclopentadiene. Benzene, hexane and tetrahydrofuran were distilled from benzophenone-ketyl under nitrogen prior to use. All chemicals were obtained from commercial sources unless noted.

The following instruments were used for physical characterization of the compounds.

|     |                                                                      |
|-----|----------------------------------------------------------------------|
| NMR | JEOL JNM-ECX400 ( $^1\text{H}$ : 400 MHz, $^{13}\text{C}$ : 101 MHz) |
|     | JEOL JNM-ECX600 ( $^1\text{H}$ : 600 MHz, $^{13}\text{C}$ : 151 MHz) |
| GC  | SHIMADZU GC-14B gas chromatograph                                    |
|     | SHIMADZU CBP1-M25-025 fused capillary column                         |
|     | SHIMADZU CR-6A-Chromatopac integrator                                |

### Preparation for Stannyl-substituted Alkyne **1a** and **1b** and Diyne **1c**

A typical procedure is given for the synthesis of **1a**. To a solution of 1-hexyne (5.74 ml, 50 mmol) in THF (100 mL) was added *n*BuLi (1.57 M in hexane, 35 mL, 55 mmol) dropwise at  $-78\text{ }^{\circ}\text{C}$ . The reaction mixture was warmed up to  $0\text{ }^{\circ}\text{C}$  and stirred for 1h and 30 min. After  $\text{Me}_3\text{SnCl}$  (1.0 M in hexanes, 55 mL, 55mmol) was added at  $-78\text{ }^{\circ}\text{C}$ , the mixture was warmed up to room temperature and stirred for 12 h. The solvent was removed under reduced pressure. **1a** was extracted with hexane and the organic phase was filtered and evaporated. Distillation of the residue gave **1a** (10.177 g, 41.5 mmol) as a colorless oil.

#### **1-Trimethylstannyl-1-hexyne (1a)**

$\text{Me}_3\text{Sn}-\text{C}\equiv\text{C}-n\text{Bu}$  Isolated yield: 83%. CAS Registry Number [1191-12-4].  
 $^1\text{H}$  NMR (400 MHz,  $\text{CDCl}_3$ ):  $\delta$  0.25 (s, 9H, satellites,  $J_{\text{HSn}(119)} = 60.4$ ,  $J_{\text{HSn}(117)} = 57.7$  Hz), 0.90 (t,  $J = 7.2$  Hz, 3H), 1.35-1.45 (m, 2 H), 1.46-1.54 (m, 2 H), 2.24 (t,  $J = 7.1$  Hz, 2 H).  
 $^{13}\text{C}\{^1\text{H}\}$  NMR(101 MHz,  $\text{CDCl}_3$ ):  $\delta$   $-7.8$  (s, satellites,  $J_{\text{CSn}(119)} = 404.5$  Hz,  $J_{\text{CSn}(117)} = 387.2$  Hz), 13.6, 19.8, 21.9, 31.1, 81.8, 111.1. HRMS(FI) Calcd for  $\text{C}_9\text{H}_{18}\text{Sn}$ ,  $[\text{M}]^+$ : 246.04318. Found: 246.04400.

#### **1-Tributylstannyl-1-hexyne (1b)**

$n\text{Bu}_3\text{Sn}-\text{C}\equiv\text{C}-n\text{Bu}$  Isolated yield: 88%. CAS Registry Number [35864-20-1].  
 $^1\text{H}$  NMR (396 MHz,  $\text{CDCl}_3$ ):  $\delta$  0.87-0.92 (two peaks (triplet) were overlapped, 12H), 0.93-0.97 (m, 6H), 1.26-1.64 (m, 16H), 2.24 (t,  $J = 6.9$  Hz, 2H).  $^{13}\text{C}\{^1\text{H}\}$  NMR(100 MHz,  $\text{CDCl}_3$ ):  $\delta$  10.9 (s, satellites,  $J_{\text{CSn}(119)} = 383.4$  Hz,  $J_{\text{CSn}(117)} = 366.2$  Hz), 13.6, 13.7, 19.8, 21.8, 27.0, 28.9, 31.2, 81.2, 111.9. HRMS(FD) Calcd for  $\text{C}_{18}\text{H}_{36}\text{Sn}$ ,  $[\text{M}]^+$ : 372.18421. Found: 372.18505.

#### **1,8-Bis(trimethylstannyl)-1,7-octadiyne (1c)**

$\text{Me}_3\text{Sn}-\text{C}\equiv\text{C}-\text{C}_4\text{H}_8-\text{C}\equiv\text{C}-\text{Me}_3\text{Sn}$  NMR yield: 71%. CAS Registry Number [178114-74-4].  
 $^1\text{H}$  NMR (396 MHz,  $\text{CDCl}_3$ ):  $\delta$  0.25 (s, 18H, satellites,  $J_{\text{HSn}(119)} = 60.3$ ,  $J_{\text{HSn}(117)} = 57.8$  Hz), 1.60-1.64 (m, 4H), 2.24-2.29 (m, 4H).  $^{13}\text{C}\{^1\text{H}\}$  NMR(100 MHz,  $\text{CDCl}_3$ ):  $\delta$   $-7.8$  (s, satellites,  $J_{\text{CSn}(119)} = 405.3$  Hz,  $J_{\text{CSn}(117)} = 387.2$  Hz), 19.6, 28.1, 82.3, 110.5. HRMS(FD) Calcd for  $\text{C}_{14}\text{H}_{27}\text{Sn}_2$ ,  $[\text{M} + \text{H}]^+$ : 433.01571. Found: 433.01573.

### Synthesis of Titanacyclopentadiene **2a**, **2b** and **7c**.

A typical procedure is given for the synthesis of **2a**. To a solution of  $\text{Cp}_2\text{TiCl}_2$  (156 mg, 0.625 mmol) in THF (2.5 mL) was added  $n\text{BuLi}$  (1.57 M in hexane, 0.80 mL, 1.25 mmol) dropwise at  $-78^\circ\text{C}$ . The reaction mixture was stirred for 1 h at the same temperature. After addition of **1a** (245 mg, 1 mmol), the mixture was warmed up to  $-10^\circ\text{C}$  and stirred for 3 h to form bis(cyclopentadienyl)-titanacyclopentadiene **2a** (dark purple solution). The solvent was removed under reduced pressure. **2a** was extracted with hexane and the organic phase was filtered and evaporated.

#### 1,1-Bis(cyclopentadienyl)-2,4-dibutyl-3,5-bis(trimethylstannyl)-1-titanacyclopentadiene (**2a**)

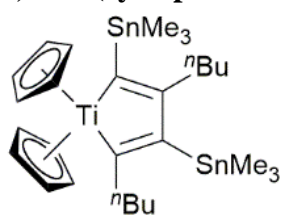

NMR yield: 92%.

$^1\text{H}$  NMR (396 MHz,  $\text{CDCl}_3$ ):  $\delta$  0.04 (s, 9H, satellites,  $J_{\text{HSn}(119)} = 48.3$ ,  $J_{\text{HSn}(117)} = 46.9$  Hz), 0.15 (s, 9H, satellites,  $J_{\text{HSn}(119)} = 48.3$ ,  $J_{\text{HSn}(117)} = 47.2$  Hz), 0.90-0.96 (m, 6H), 1.18-1.31 (m, 8H), 1.67-1.71 (m, 2H), 1.80-1.84 (m, 2H), 6.13 (s, 10H).  $^{13}\text{C}\{^1\text{H}\}$  NMR(100 MHz,  $\text{CDCl}_3$ ):  $\delta$   $-5.6$  (s, satellites,  $J_{\text{CSn}(119)} = 290.1$  Hz,  $J_{\text{CSn}(117)} = 277.5$  Hz),  $-4.0$  (s, satellites,  $J_{\text{CSn}(119)} = 283.2$  Hz,  $J_{\text{CSn}(117)} = 271.8$  Hz), 14.1, 14.5, 22.9, 23.6, 33.9, 34.1, 41.5, 43.1, 112.6, 134.8 (s, satellites,  $J_{\text{CSn}(119)} = 367.8$  Hz,  $J_{\text{CSn}(117)} = 350.6$  Hz), 141.8, 214.9 (s, satellites,  $J_{\text{CSn}(119)} = 268.4$  Hz,  $J_{\text{CSn}(117)} = 257.0$  Hz), 225.1. HRMS(FD) Calcd for  $\text{C}_{28}\text{H}_{46}\text{Sn}_2\text{Ti}$ ,  $[\text{M}]^+$ : 668.11329. Found: 668.11601.

#### 1,1-Bis(cyclopentadienyl)-2,4-dibutyl-3,5-bis(tributylstannyl)-1-titanacyclopentadiene (**2b**)

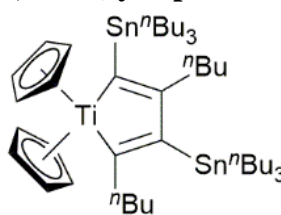

NMR yield: 93%.

$^1\text{H}$  NMR (400 MHz,  $\text{CDCl}_3$ ):  $\delta$  0.69-0.76 (m, 6H), 0.81-0.87 (m, 6H), 0.90-0.97 (m, 24H), 1.19-1.58 (m, 32H), 1.63-1.67 (m, 2H), 1.80-1.84 (m, 2H), 6.09 (s, 10H).  $^{13}\text{C}\{^1\text{H}\}$  NMR(101 MHz,  $\text{CDCl}_3$ ):  $\delta$  12.1, 13.4, 13.7, 13.8, 14.2, 14.5, 23.3, 23.7, 27.7, 27.8, 29.5, 29.5, 34.3, 34.4, 42.0, 44.4, 112.5, 133.0 (s, satellites,  $J_{\text{CSn}(119)} = 295.9$  Hz,  $J_{\text{CSn}(117)} = 282.1$  Hz), 140.7, 215.0 (s, satellites,  $J_{\text{CSn}(119)} = 203.5$  Hz,  $J_{\text{CSn}(117)} = 195.4$  Hz), 224.8. HRMS(FD) Calcd for  $\text{C}_{46}\text{H}_{82}\text{Sn}_2\text{Ti}$ ,  $[\text{M}]^+$ : 920.39566. Found: 920.39662.

#### 8,8-Bis(cyclopentadienyl)-7,9-bis(trimethylstannyl)-8-titanabicyclo[4,3,0]-1,6-nonadiene (**7c**)

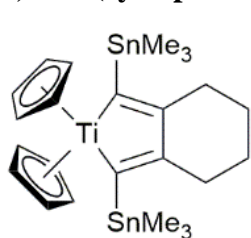

NMR yield: 94%.

$^1\text{H}$  NMR (396 MHz,  $\text{CDCl}_3$ ):  $\delta$  0.02 (s, 18H, satellites,  $J_{\text{HSn}(119)} = 49.2$ ,  $J_{\text{HSn}(117)} = 47.1$  Hz), 1.33-1.41 (m, 4H), 1.76-1.83 (m, 4H), 6.11 (s, 10H).  $^{13}\text{C}\{^1\text{H}\}$  NMR(100 MHz,  $\text{CDCl}_3$ ):  $\delta$   $-6.0$  (s, satellites,  $J_{\text{CSn}(119)} = 294.7$  Hz,  $J_{\text{CSn}(117)} = 281.0$  Hz), 23.5, 35.5, 113.3, 142.8 (s, satellites,  $J_{\text{CSn}(119)} = 139.3$  Hz,  $J_{\text{CSn}(117)} = 133.6$  Hz), 224.2 (s, satellites,  $J_{\text{CSn}(119)} = 267.2$  Hz,  $J_{\text{CSn}(117)} = 254.7$  Hz). HRMS(FD) Calcd for  $\text{C}_{24}\text{H}_{36}\text{Sn}_2\text{Ti}$ ,  $[\text{M}]^+$ : 610.03489. Found: 610.03390.

### Synthesis of Zirconacyclopentadiene **3a**, **3b** and **8a**.

A typical procedure is given for the synthesis of **3a**. To a solution of  $\text{Cp}_2\text{ZrCl}_2$  (183 mg, 0.625 mmol) in THF (2.5 mL) was added  $n\text{BuLi}$  (1.57 M in hexane, 0.80 mL, 1.25 mmol) dropwise at  $-78^\circ\text{C}$ . The reaction mixture was stirred for 1 h at the same temperature. After addition of **1a** (245 mg, 1 mmol), the mixture was warmed up to  $20^\circ\text{C}$  and stirred for 24 h to form bis(cyclopentadienyl)-zirconacyclopentadiene **3a** (red solution). The solvent was removed under reduced pressure. **3a** was extracted with hexane and the organic phase was filtered and evaporated.

#### 1,1-Bis(cyclopentadienyl)-3,4-dibutyl-2,5-bis(trimethylstannyl)-1-zirconacyclopentadiene (**3a**)

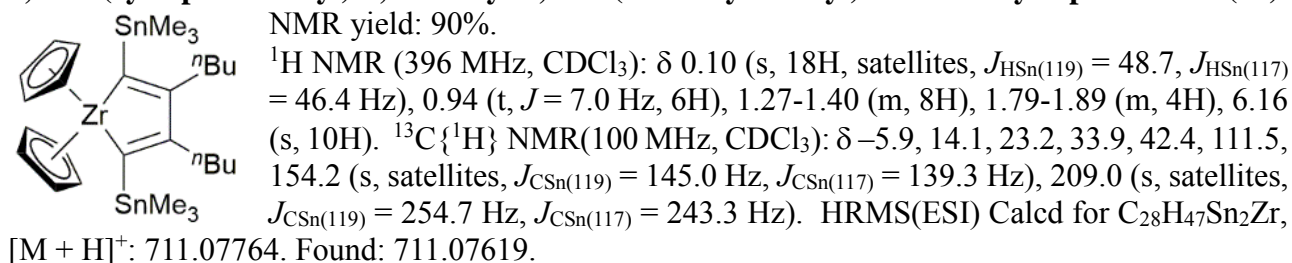

#### 1,1-Bis(cyclopentadienyl)-3,4-dibutyl-2,5-bis(tributylstannyl)-1-zirconacyclopentadiene (**3b**)

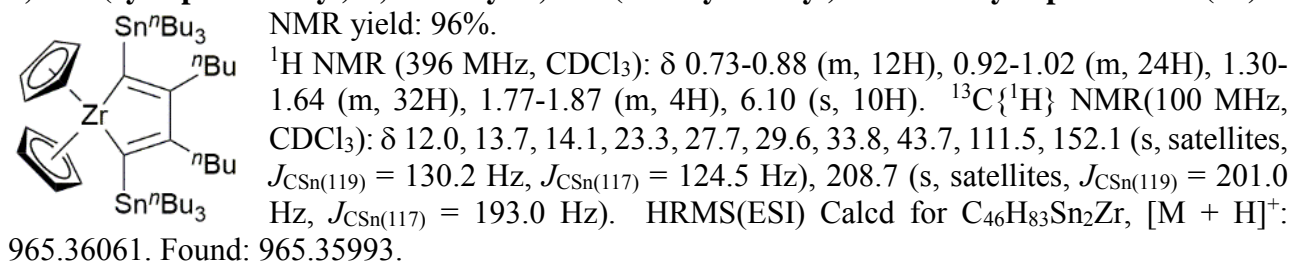

When the reaction mixture was stirred for 3 h instead of 24 h, the mixture of **3a** (57% NMR yield) and **8a** (34% NMR yield) was obtained.

#### 1,1-Bis(cyclopentadienyl)-2,4-dibutyl-3,5-bis(trimethylstannyl)-1-zirconacyclopentadiene (**8a**)

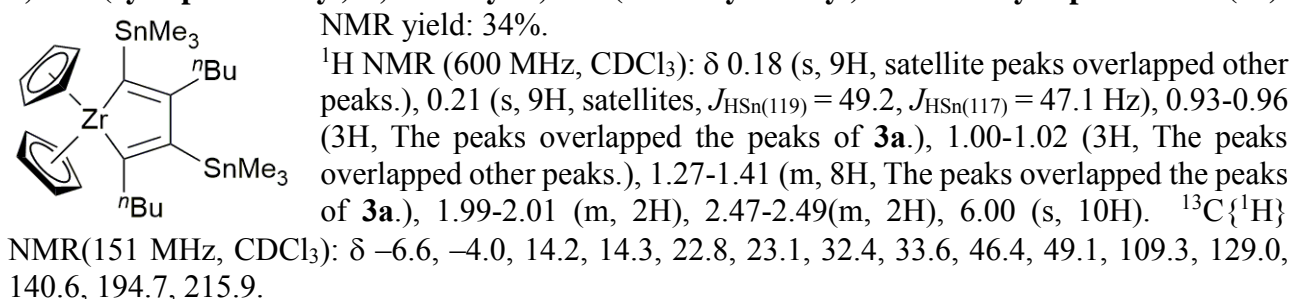

<sup>1</sup>H NMR Monitoring Reaction of Alkyne **1a** with Cp<sub>2</sub>ZrBu<sub>2</sub>

To a solution of Cp<sub>2</sub>ZrCl<sub>2</sub> (183 mg, 0.625 mmol) in *d*-THF (2.5 mL) was added <sup>n</sup>BuLi (1.57 M in hexane, 0.80 mL, 1.25 mmol) dropwise at -78 °C. The reaction mixture was stirred for 1 h at the same temperature. After addition of **1a** (245 mg, 1 mmol) and mesitylene (69.5 μL, 0.50 mmol), the mixture was warmed up to 20 °C and monitored by <sup>1</sup>H NMR. The <sup>1</sup>H NMR monitoring reaction showed that unsymmetrical complex **8a** was converted into symmetrical complex **3a** in 82% yield (Figure S24).

### Reactions of Silyl-substituted Alkyne **4** with Cp<sub>2</sub>TiBu<sub>2</sub>

To a solution of Cp<sub>2</sub>TiCl<sub>2</sub> (156 mg, 0.625 mmol) in THF (2.5 mL) was added <sup>n</sup>BuLi (1.57 M in hexane, 0.80 mL, 1.25 mmol) dropwise at -78 °C. The reaction mixture was stirred for 1 h at the same temperature. After addition of 1-trimethylsilyl-1-propyne **4** (150 μL, 1 mmol), the mixture was warmed up to -10 °C and stirred for 3 h, which gave a mixture of bis(cyclopentadienyl)-titanacyclopentadiene **5** (67% NMR yield) and **6** (19% NMR yield). When the reaction mixture was warmed up to 40 °C and stirred for 24 h, **5** was completely converted into **6** (46% NMR yield). Column chromatography on alumina (eluent: benzene) and crystallization from toluene at -30 °C afforded fine crystals of **6** for X-ray analysis. X-ray structure and crystallographic data of **6** were shown in Figure S1 and Table S1.

#### 1,1-Bis(cyclopentadienyl)-2,4-dimethyl-3,5-bis(trimethylsilyl)-1-titanacyclopentadiene (**5**)

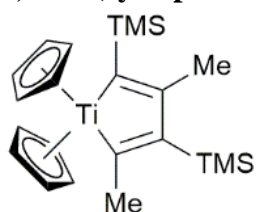

NMR yield: 67%.

<sup>1</sup>H NMR (396 MHz, CDCl<sub>3</sub>): δ -0.06 (s, 9H), 0.14 (s, 9H), 1.46 (s, 3H), 1.63 (s, 3H), 6.14 (s, 10H). <sup>13</sup>C{<sup>1</sup>H} NMR(101 MHz, CDCl<sub>3</sub>): δ 2.7, 4.0, 24.8, 27.4, 112.4, 139.7, 140.4, 209.0, 225.2.

#### 1,1-Bis(cyclopentadienyl)-3,4-dimethyl-2,5-bis(trimethylsilyl)-1-titanacyclopentadiene (**6**)

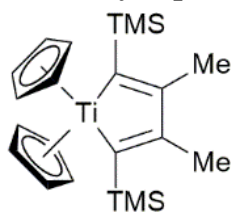

NMR yield: 19% (-10 °C, 3 h).

NMR yield: 46% (40 °C, 24 h). Isolated yield: 23%.

CAS Registry Number [148540-24-3].

<sup>1</sup>H NMR (400 MHz, CDCl<sub>3</sub>): δ 0.01 (s, 18H), 1.47 (s, 6H), 6.16 (s, 10H).

<sup>13</sup>C{<sup>1</sup>H} NMR(101 MHz, CDCl<sub>3</sub>): δ 2.8, 23.3, 112.9, 138.4, 216.7.

### X-ray Crystallographic Studies

All measurements were made on a Rigaku R-AXIS RAPID diffractometer using graphite monochromated Mo-K $\alpha$  radiation. The structure was solved by direct methods SHELXS 2013/1 and refined on  $F^2$  using SHELXL-2018/3. All calculations were performed using the CrystalStructure crystallographic software package. All non-hydrogen atoms were refined anisotropically. The hydrogen atoms attached to C(5) and C(6) atoms were located by difference Fourier maps and refined isotropically. The other hydrogen atoms were refined using the riding model. X-ray crystallographic data and refinement detail for compound **6** is summarized in Table S1.



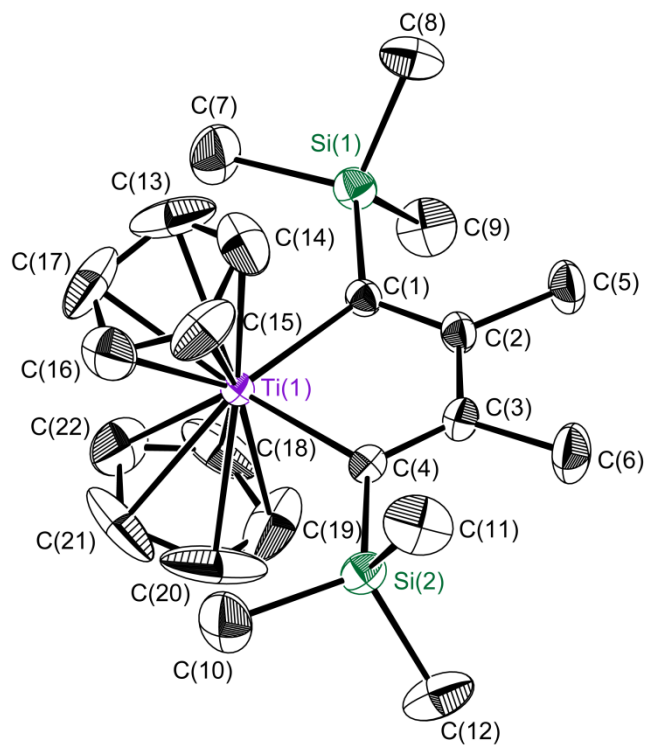

**Fig. S1.** X-ray Structure of **6**. All hydrogen atoms are omitted for clarity.

**Table S1.** X-ray Crystallographic Data and Refinement Details for Titanacyclopentadiene **6**.

| <b>6</b>                                                                                             |                                                    |
|------------------------------------------------------------------------------------------------------|----------------------------------------------------|
| Formula                                                                                              | C <sub>22</sub> H <sub>34</sub> Si <sub>2</sub> Ti |
| <i>FW</i>                                                                                            | 402.57                                             |
| <i>T</i> / K                                                                                         | 298                                                |
| Colour, shape                                                                                        | Orange, prism                                      |
| Crystal size / mm                                                                                    | 0.50 x 0.30 x 0.20                                 |
| Crystal system                                                                                       | Triclinic                                          |
| Space group, <i>Z</i>                                                                                | <i>P</i> -1, 2                                     |
| <i>a</i> / Å                                                                                         | 9.709(5)                                           |
| <i>b</i> / Å                                                                                         | 10.178(6)                                          |
| <i>c</i> / Å                                                                                         | 12.212(6)                                          |
| $\alpha$ / deg.                                                                                      | 96.05(2)                                           |
| $\beta$ / deg.                                                                                       | 95.99(2)                                           |
| $\gamma$ / deg.                                                                                      | 104.28(2)                                          |
| <i>V</i> / Å <sup>3</sup>                                                                            | 1152.3(10)                                         |
| <i>D</i> <sub>x</sub> / Mg m <sup>-3</sup>                                                           | 1.160                                              |
| <i>F</i> (000)                                                                                       | 432                                                |
| $\mu$ (Mo K $\alpha$ ) / mm <sup>-1</sup>                                                            | 0.478                                              |
| <i>T</i> <sub>min</sub> , <i>T</i> <sub>max</sub>                                                    | 0.7960, 0.9104                                     |
| <i>R</i> <sub>int</sub>                                                                              | 0.0231                                             |
| Refln./param. ratio                                                                                  | 5222/250                                           |
| <i>R</i> 1 [ <i>F</i> <sub>o</sub> <sup>2</sup> > 2 $\sigma$ ( <i>F</i> <sub>o</sub> <sup>2</sup> )] | 0.0430                                             |
| <i>wR</i> 2 (all refln)                                                                              | 0.1254                                             |
| GoF                                                                                                  | 1.078                                              |

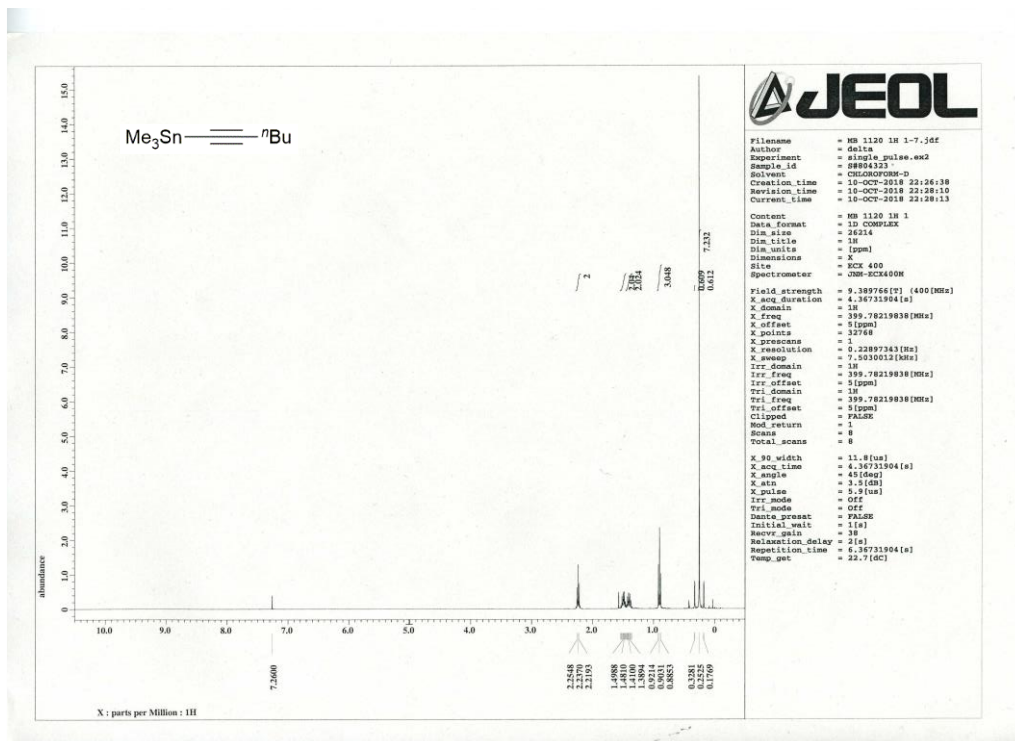

Fig. S2.  $^1\text{H}$  NMR Spectrum of 1-trimethylstannyl-1-hexyne (**1a**).

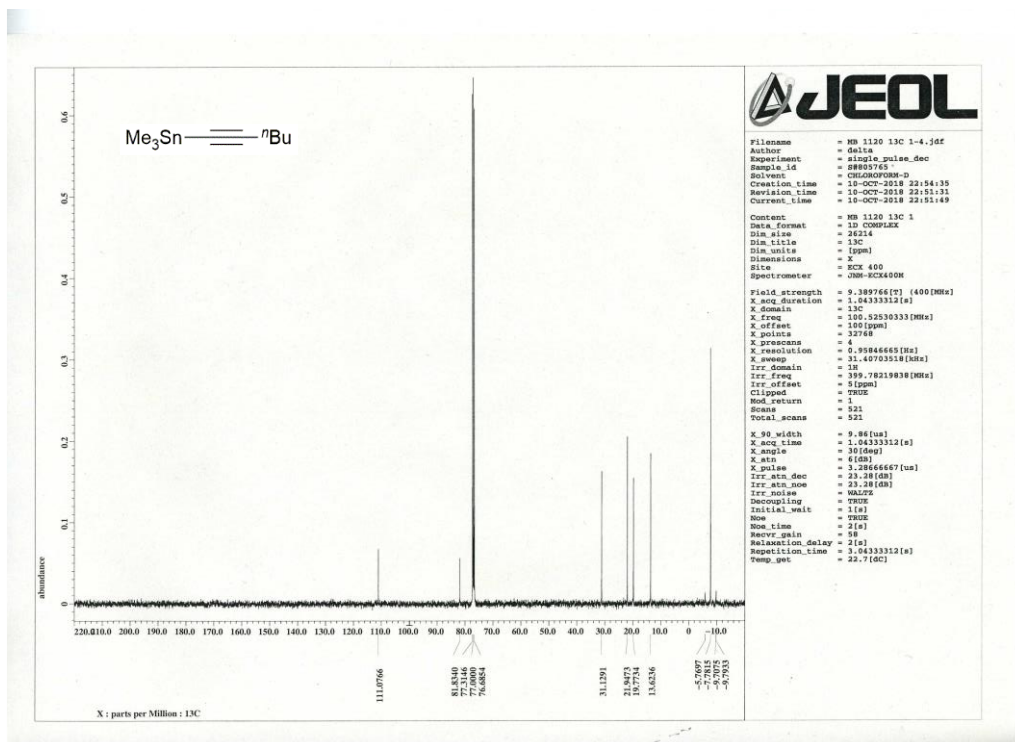

Fig. S3.  $^{13}\text{C}$  NMR Spectrum of 1-trimethylstannyl-1-hexyne (**1a**).

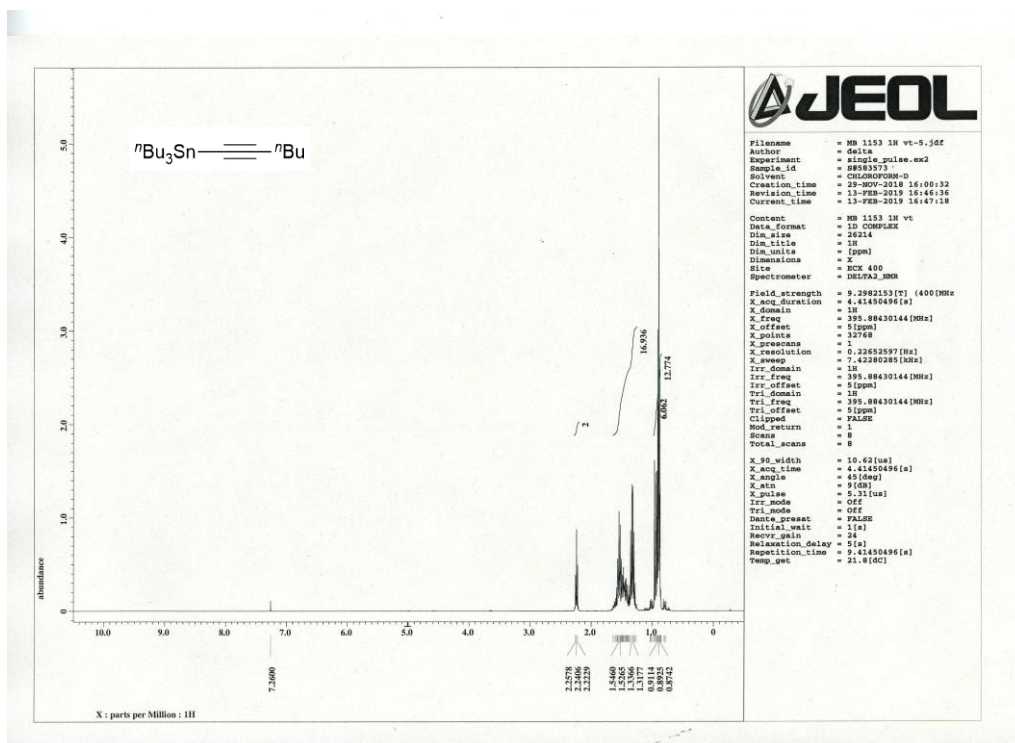

Fig. S4.  $^1\text{H}$  NMR Spectrum of 1-Tributylstannyl-1-hexyne (**1b**).

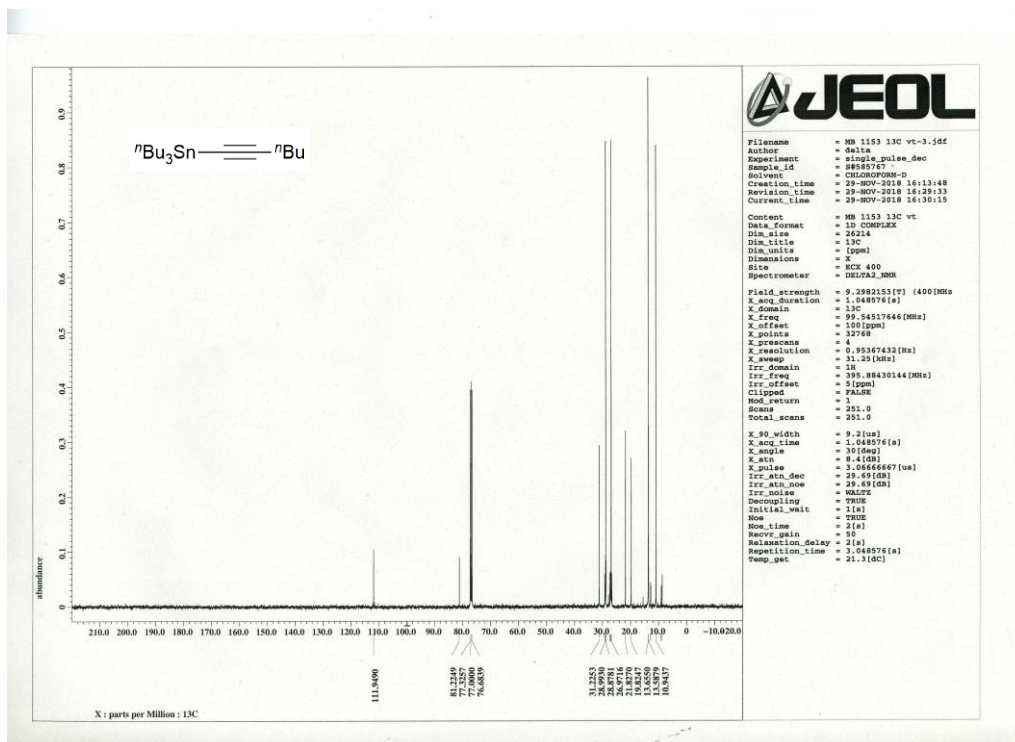

Fig. S5.  $^{13}\text{C}$  NMR Spectrum of 1-Tributylstannyl-1-hexyne (**1b**).

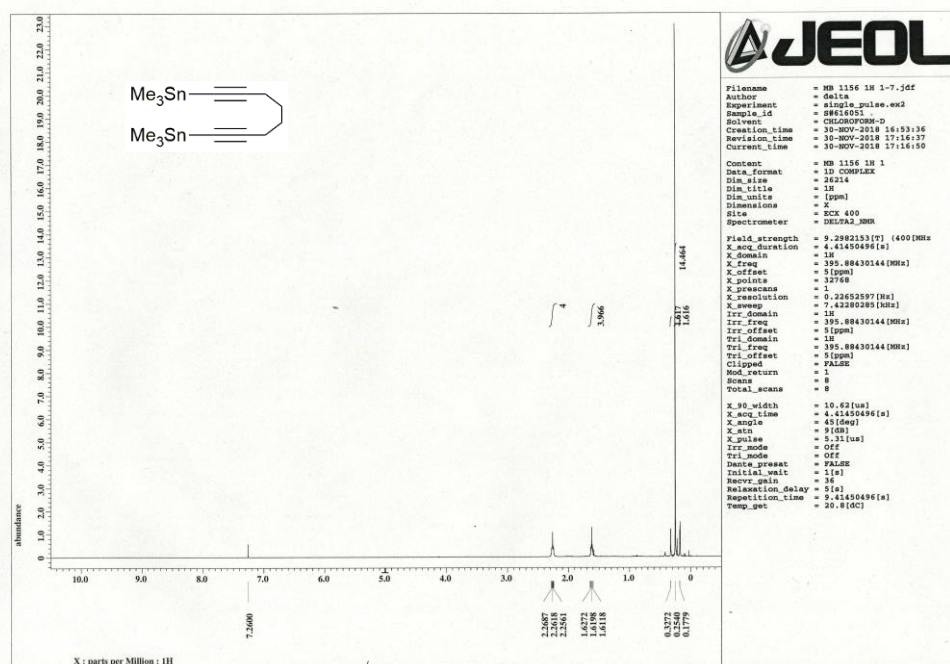

Fig. S6.  $^1\text{H}$  NMR Spectrum of 1,8-Bis(trimethylstannyl)-1,7-octadiyne (**1c**).

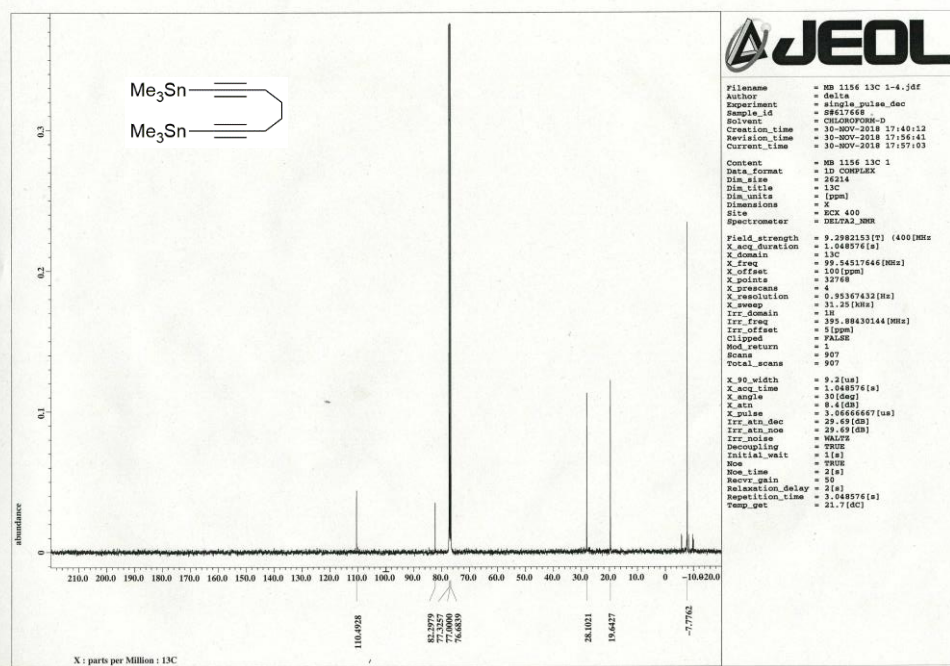

Fig. S7.  $^{13}\text{C}$  NMR Spectrum of 1,8-Bis(trimethylstannyl)-1,7-octadiyne (**1c**).



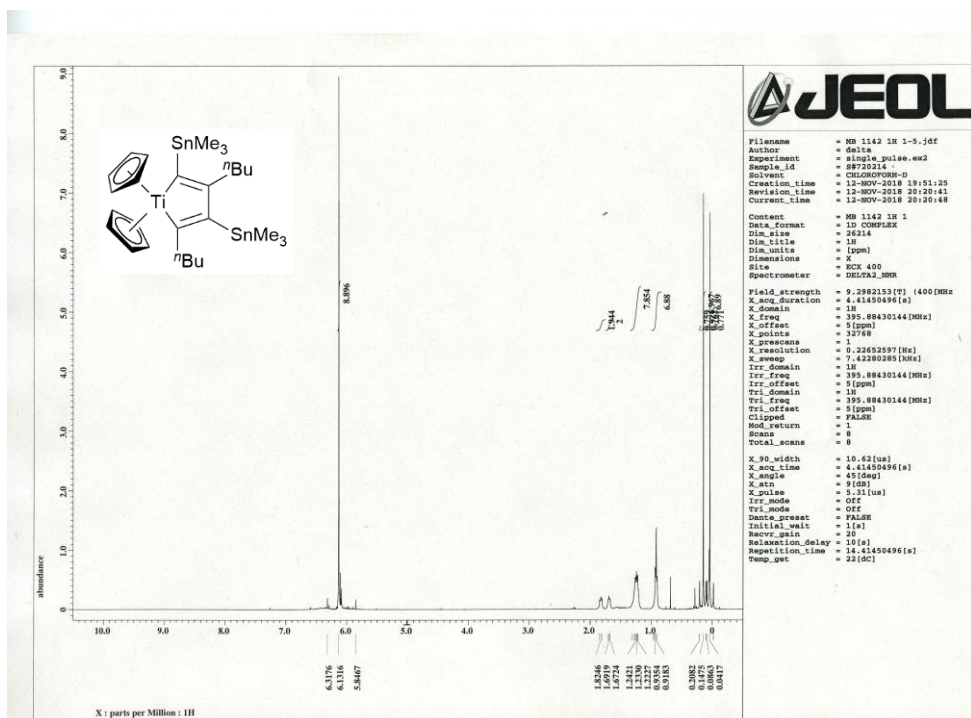

**Fig. S8.**  $^1\text{H}$  NMR Spectrum of 1,1-Bis(cyclopentadienyl)-2,4-dibutyl-2,5-bis(trimethylstannyl)-1-titanacyclopentadiene (**2a**).

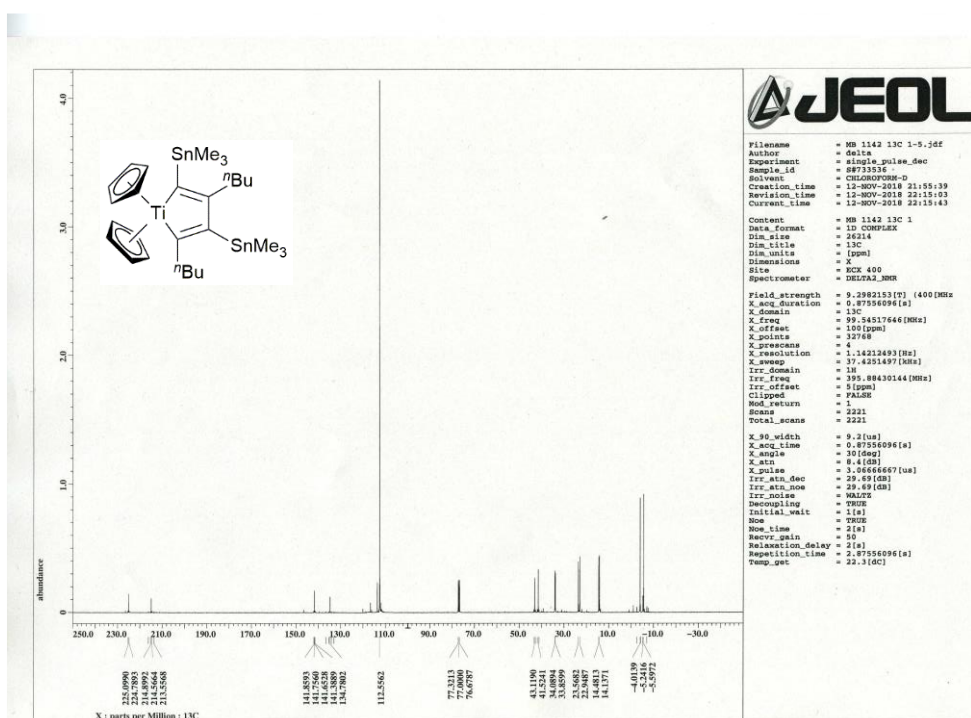

**Fig. S9.**  $^{13}\text{C}$  NMR Spectrum of 1,1-Bis(cyclopentadienyl)-2,4-dibutyl-2,5-bis(trimethylstannyl)-1-titanacyclopentadiene (**2a**).

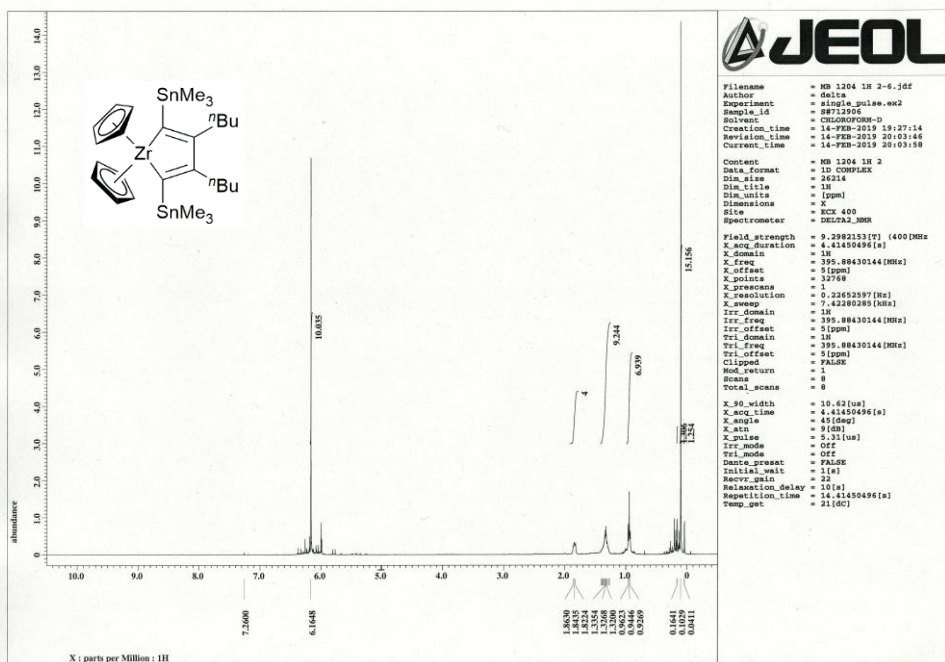

**Fig. S10.** <sup>1</sup>H NMR Spectrum of 1,1-Bis(cyclopentadienyl)-3,4-dibutyl-2,5-bis(trimethylstannyl)-1-zirconacyclopentadiene (**3a**).

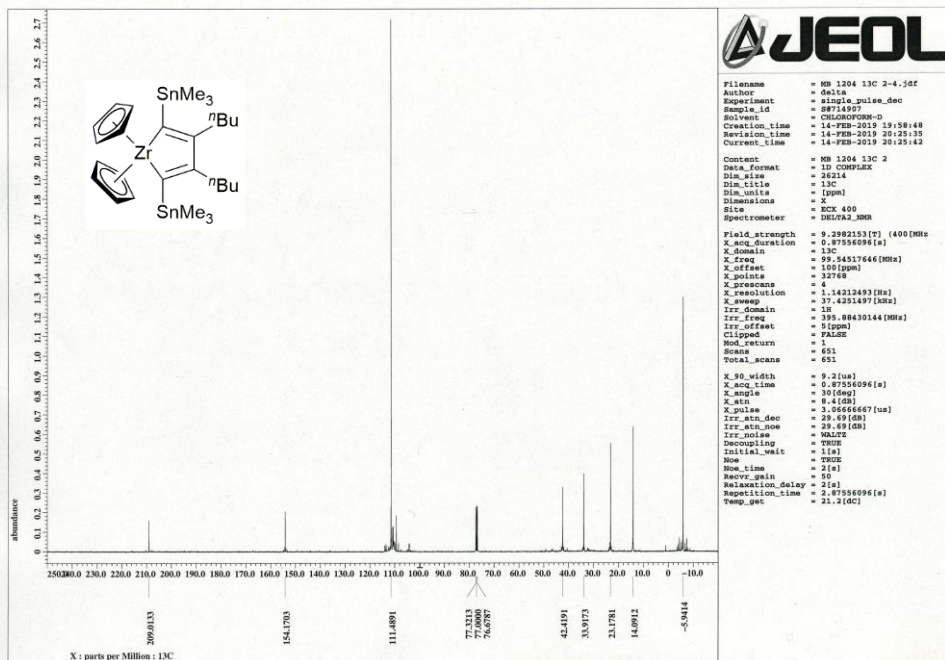

**Fig. S11.** <sup>13</sup>C NMR Spectrum of 1,1-Bis(cyclopentadienyl)-3,4-dibutyl-2,5-bis(trimethylstannyl)-1-zirconacyclopentadiene (**3a**).

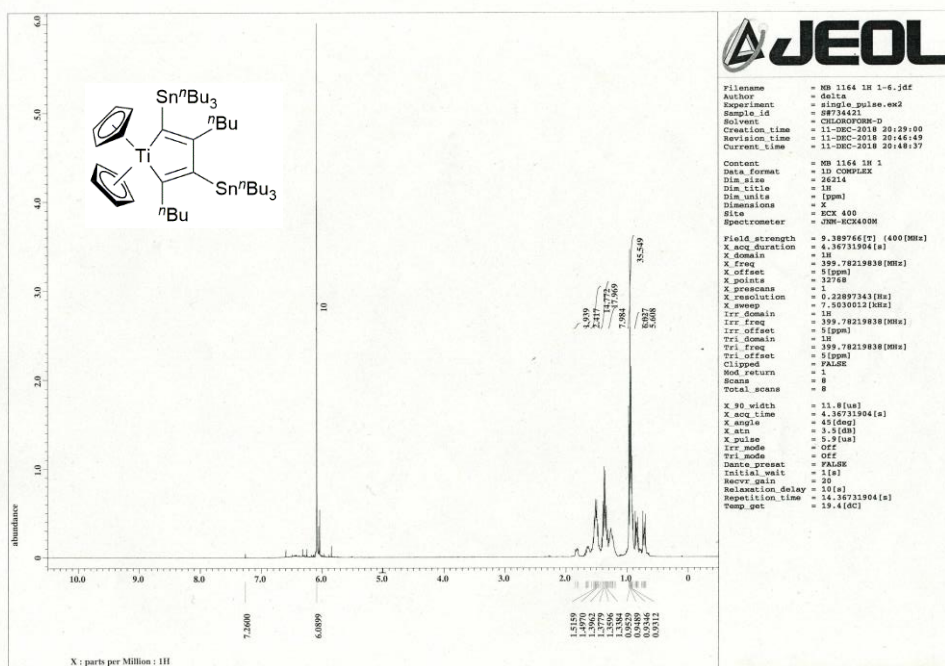

**Fig. S12.** <sup>1</sup>H NMR Spectrum of 1,1-Bis(cyclopentadienyl)-2,4-dibutyl-3,5-bis(tributylstannyl)-1-titanacyclopentadiene (**2b**).

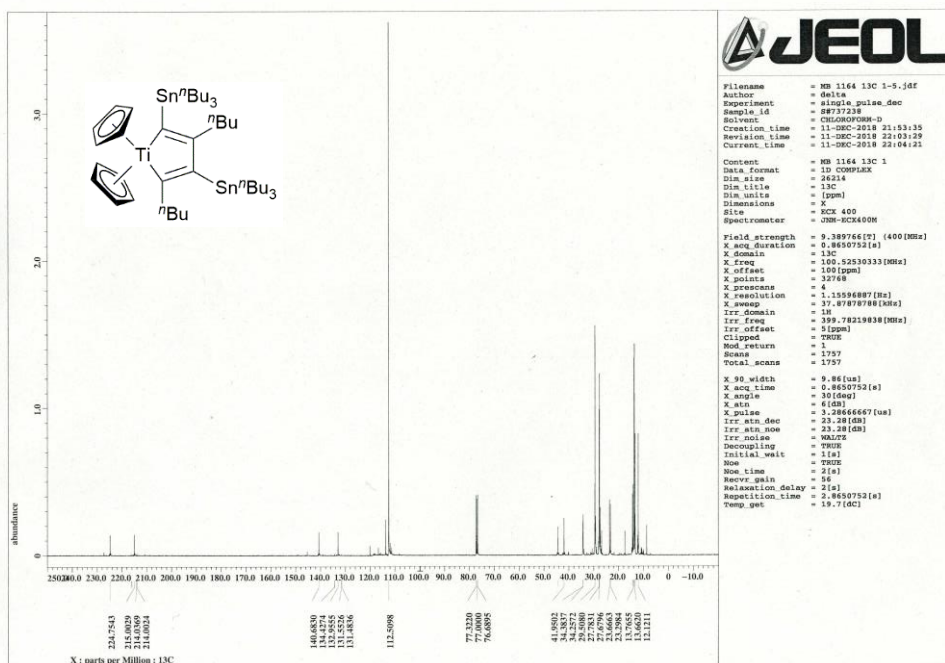

**Fig. S13.** <sup>13</sup>C NMR Spectrum of 1,1-Bis(cyclopentadienyl)-2,4-dibutyl-3,5-bis(tributylstannyl)-1-titanacyclopentadiene (**2b**).



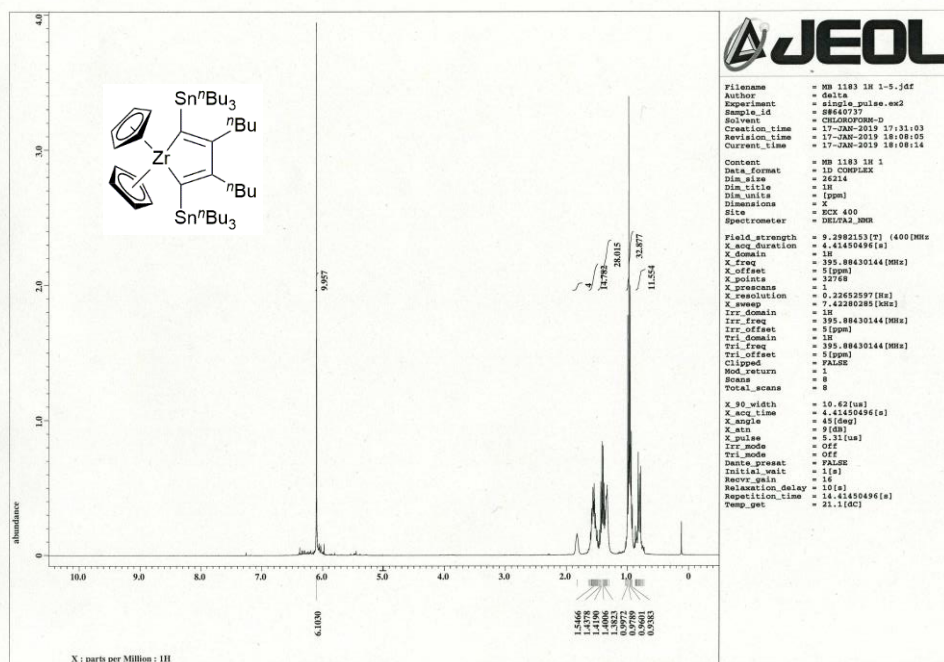

**Fig. S14.**  $^1\text{H}$  NMR Spectrum of 1,1-Bis(cyclopentadienyl)-3,4-dibutyl-2,5-bis(tributylstannyl)-1-zirconacyclopentadiene (**3b**).

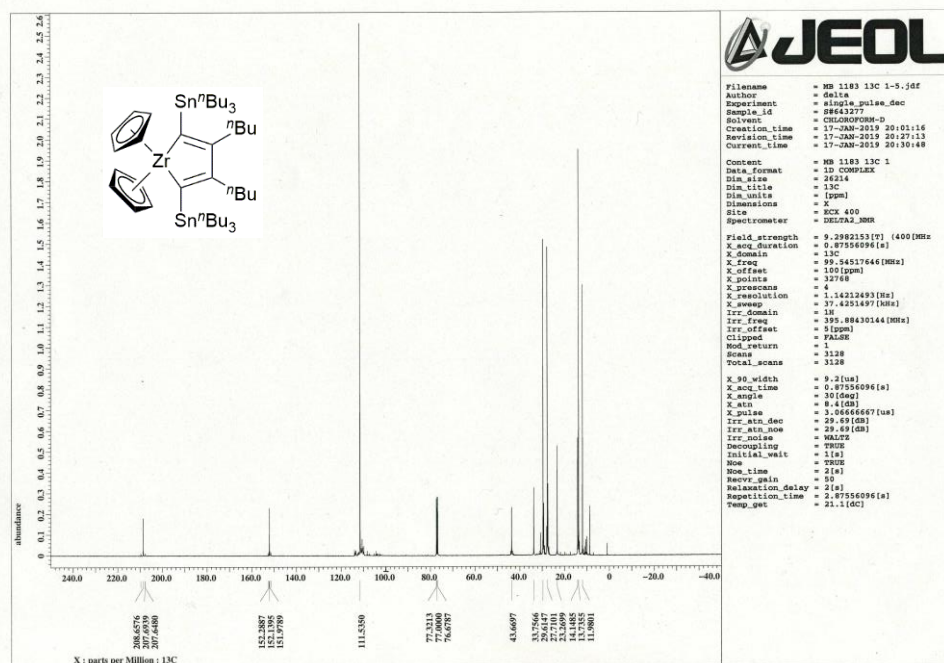

**Fig. S15.**  $^{13}\text{C}$  NMR Spectrum of 1,1-Bis(cyclopentadienyl)-3,4-dibutyl-2,5-bis(tributylstannyl)-1-zirconacyclopentadiene (**3b**).

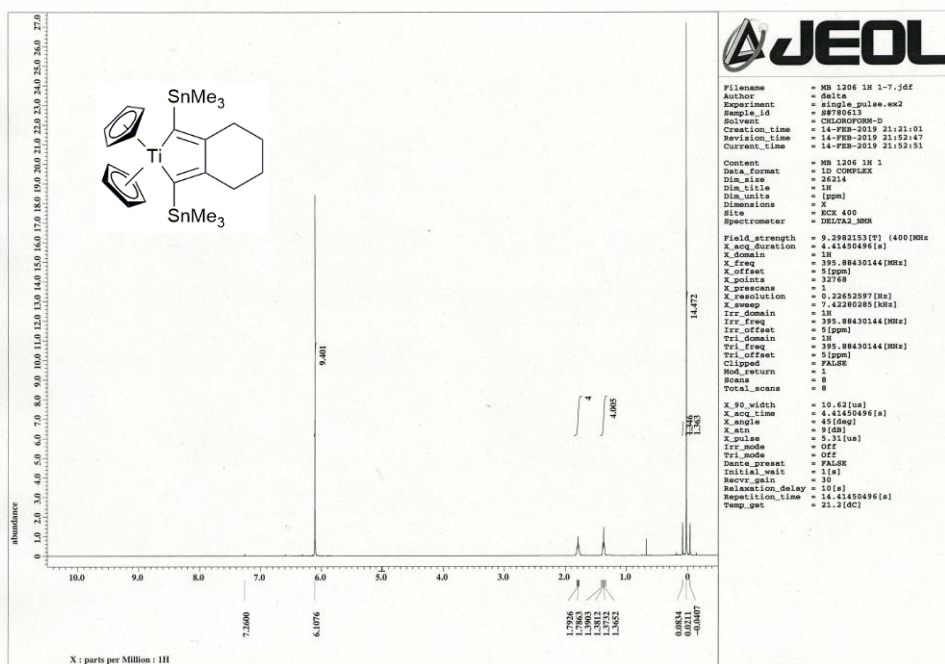

**Fig. S16.** <sup>1</sup>H NMR Spectrum of 8,8-bis(cyclopentadienyl)-7,9-bis(trimethylstannyl)-8-titanabicyclo[4,3,0]-1,6-nonadiene (**7c**).

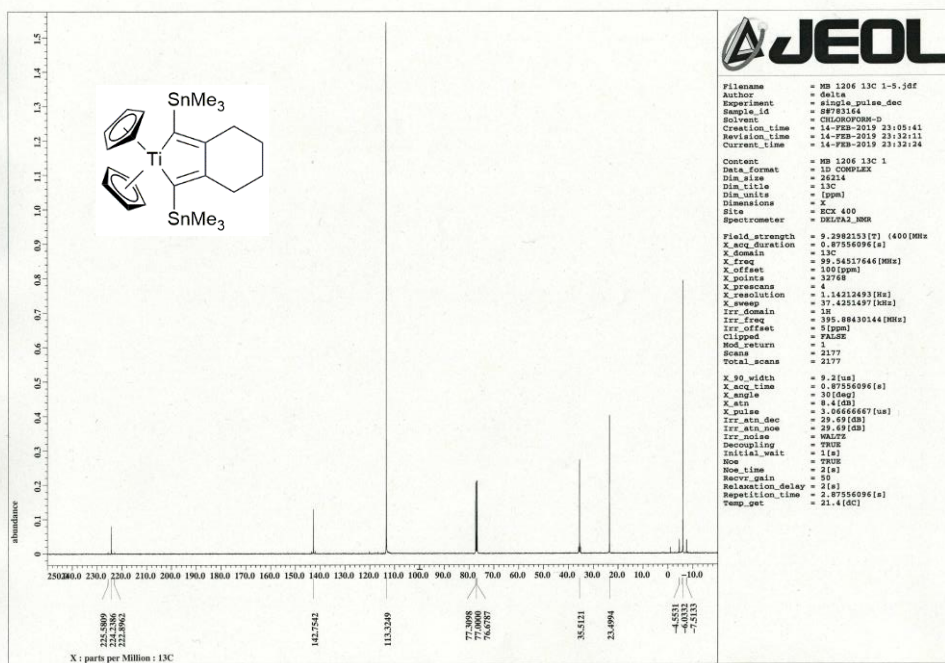

**Fig. S17.** <sup>13</sup>C NMR Spectrum of 8,8-bis(cyclopentadienyl)-7,9-bis(trimethylstannyl)-8-titanabicyclo[4,3,0]-1,6-nonadiene (**7c**).





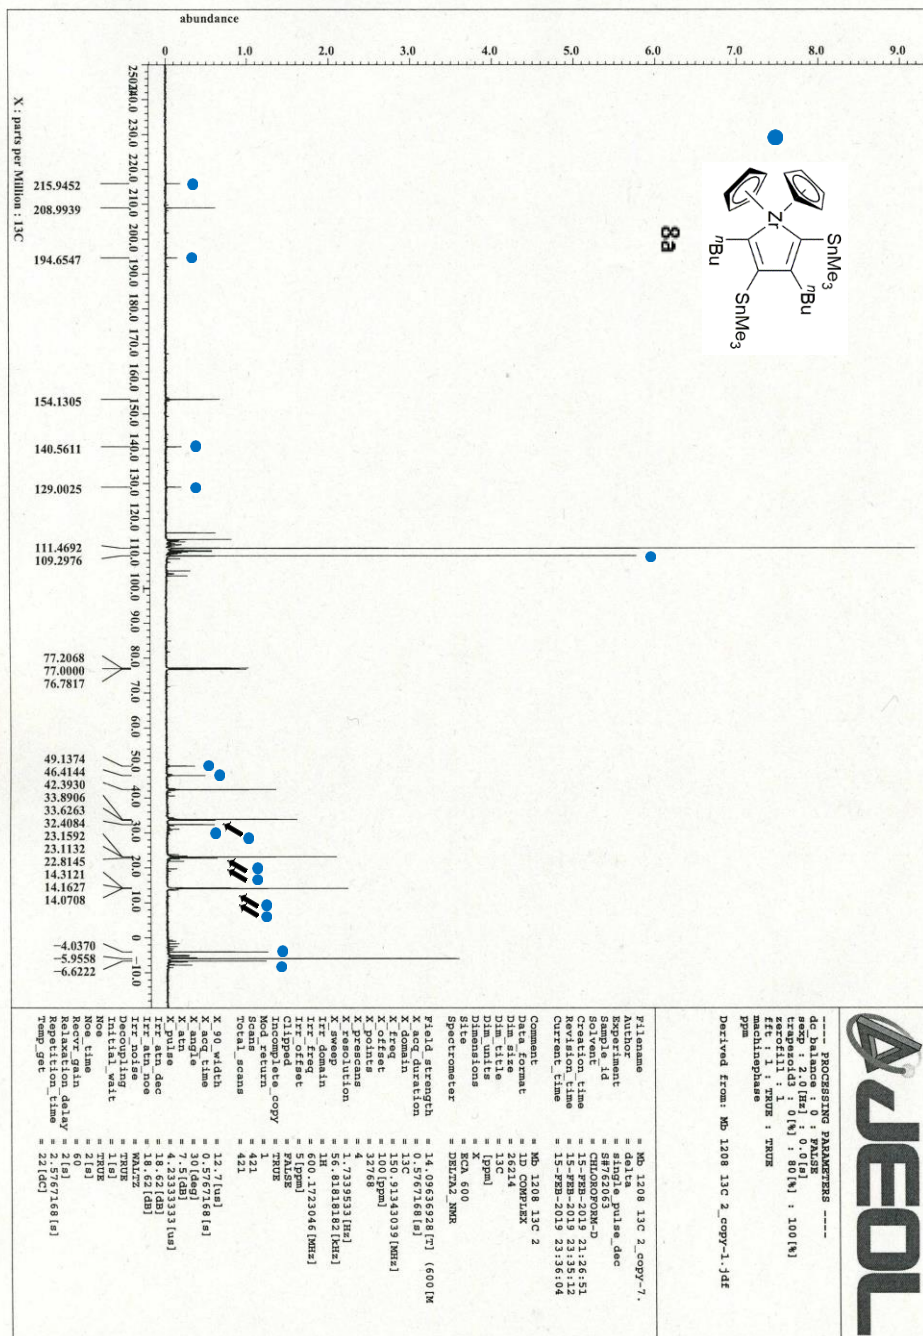

Fig. S19. <sup>13</sup>C NMR Spectrum of a mixture of **3a** and **8a**.

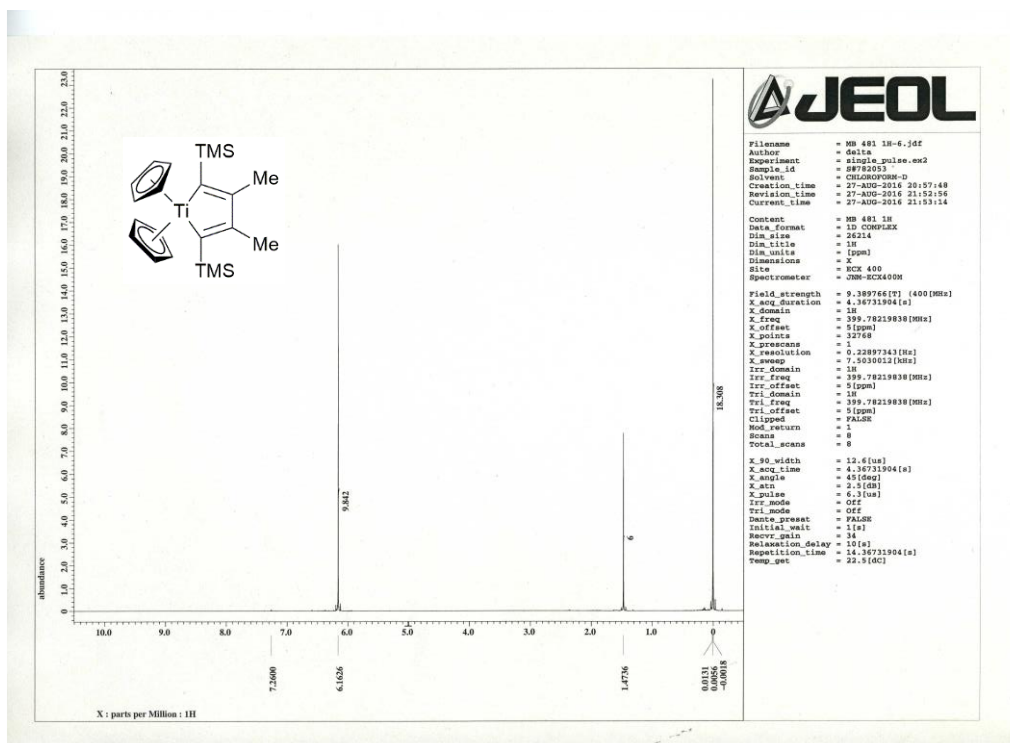

**Fig. S20.**  $^1\text{H}$  NMR Spectrum of 1,1-Bis(cyclopentadienyl)-3,4-dimethyl-2,5-bis(trimethylsilyl)-1-titanacyclopentadiene (**6**).

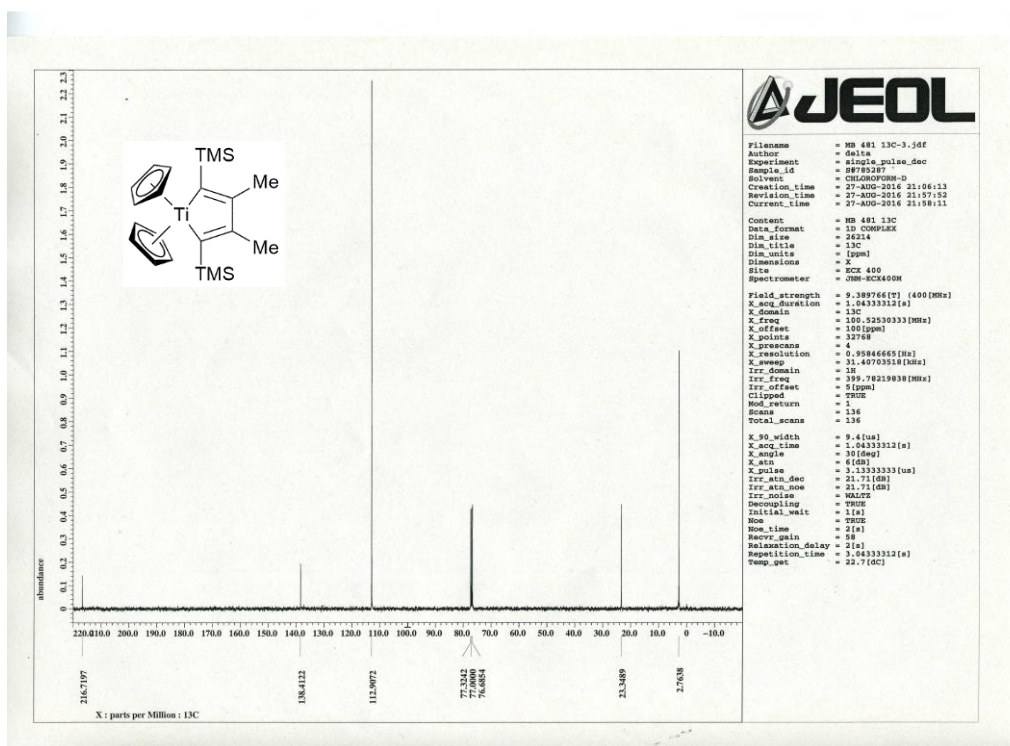

**Fig. S21.**  $^{13}\text{C}$  NMR Spectrum of 1,1-Bis(cyclopentadienyl)-3,4-dimethyl-2,5-bis(trimethylsilyl)-1-titanacyclopentadiene (**6**).





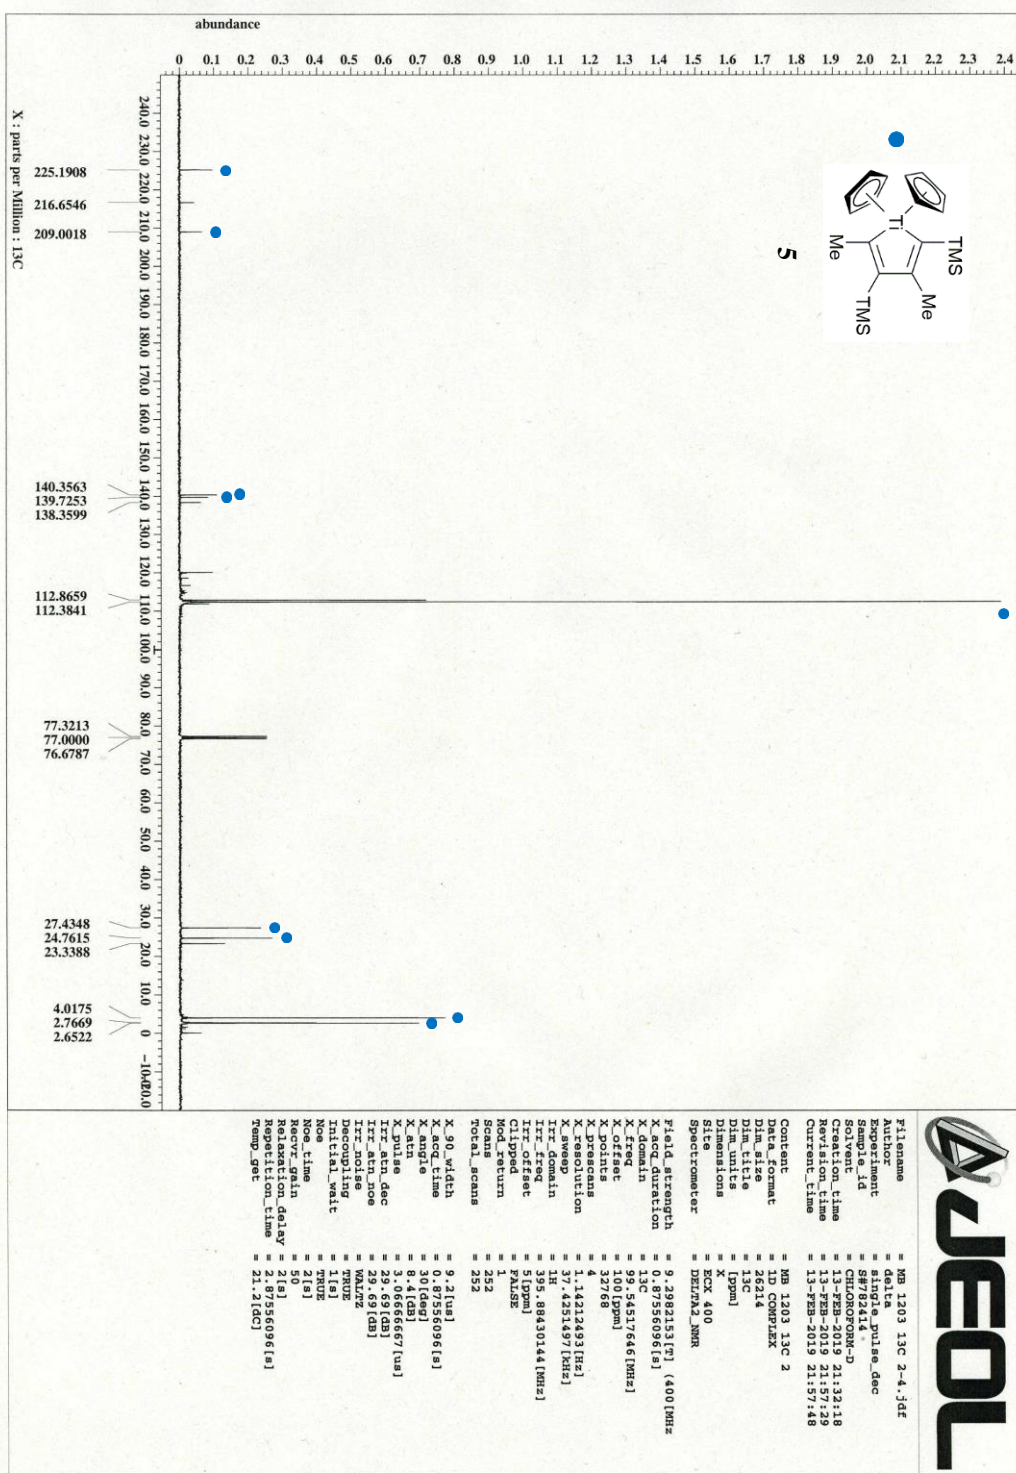

Fig. S23. <sup>13</sup>C NMR Spectrum of a mixture **5** and **6**.

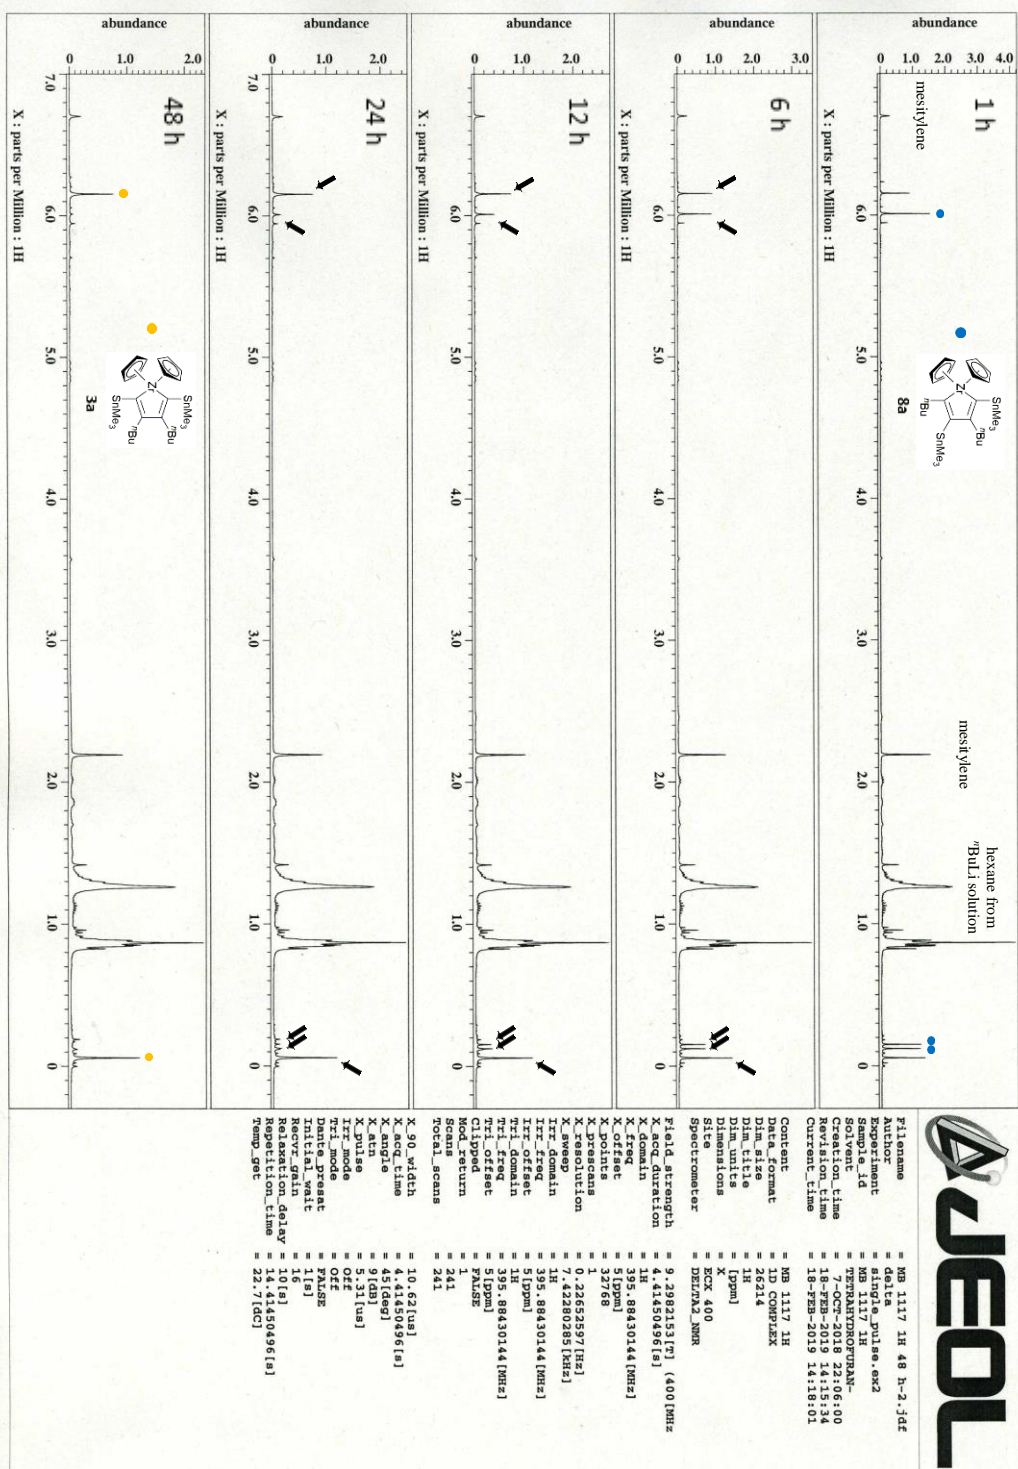

Fig. S24.  $^1\text{H}$  NMR Monitoring Reaction of Alkyne **1a** with  $\text{Cp}_2\text{ZrBu}_2$  (Conversion of **8a** into **3a**).



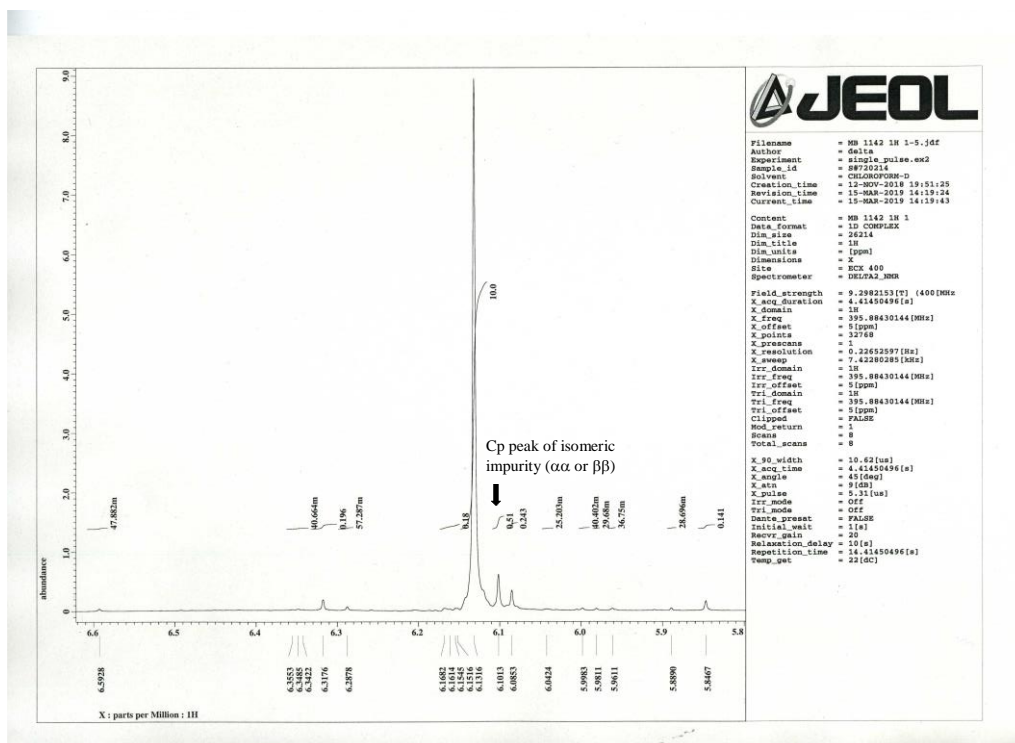

Fig. S25. An Enlarged  $^1\text{H}$  NMR Spectrum of **2a** (5.8-6.6 ppm).

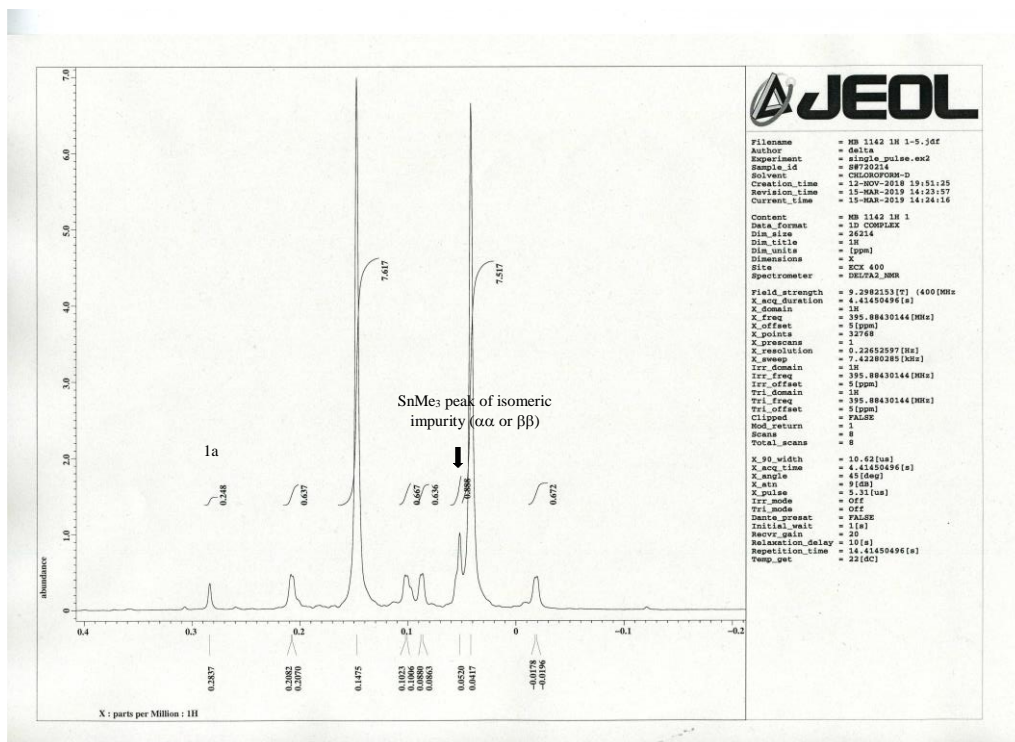

Fig. S26. An Enlarged  $^1\text{H}$  NMR Spectrum of **2a** (-0.2-0.4 ppm).

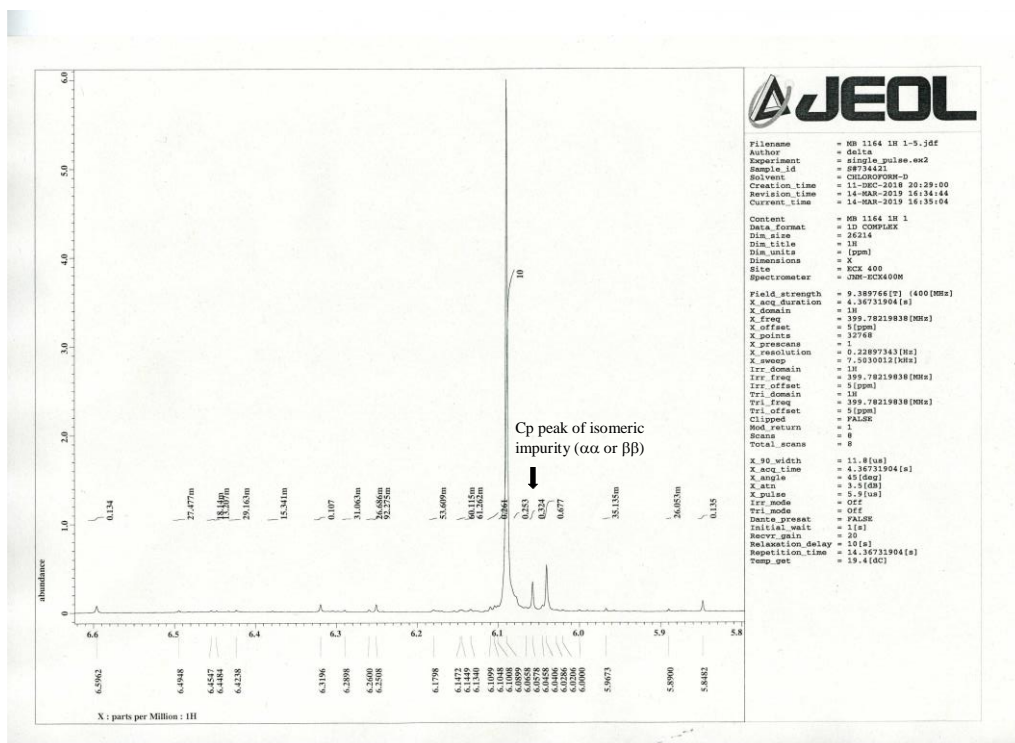

Fig. S27. An Enlarged  $^1\text{H}$  NMR Spectrum of **2b** (5.8-6.6 ppm).

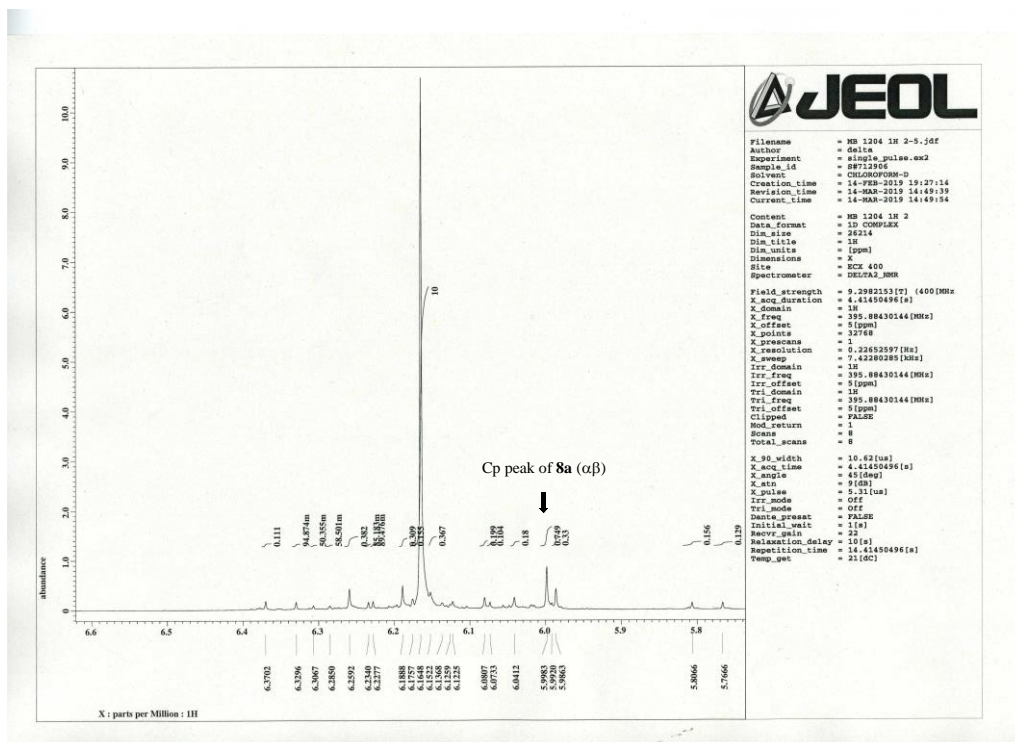

Fig. S28. An Enlarged  $^1\text{H}$  NMR Spectrum of **3a** (5.7-6.6 ppm).

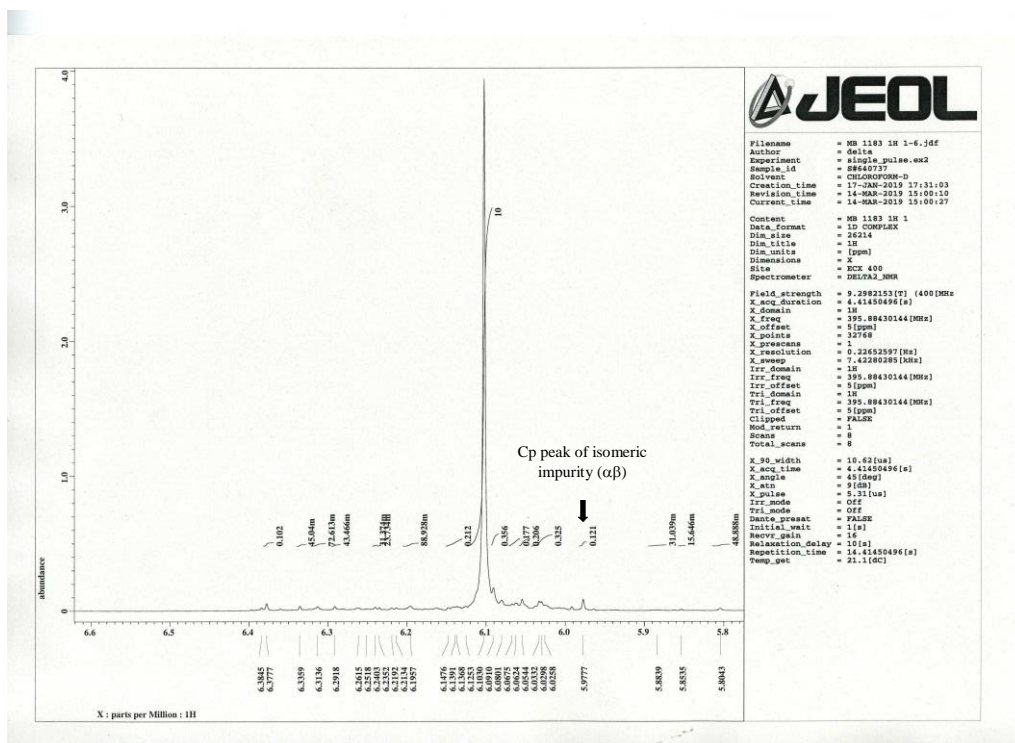

Fig. S29. An Enlarged <sup>1</sup>H NMR Spectrum of **3b** (5.8-6.6 ppm).

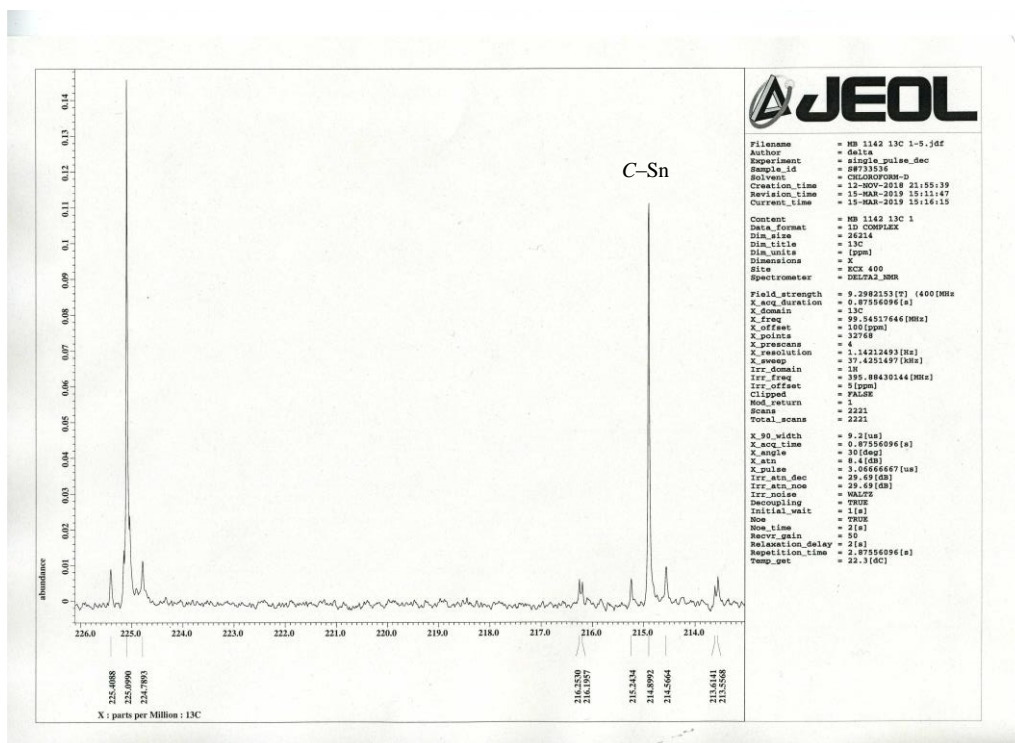

**Fig. S30.** An Enlarged  $^{13}\text{C}$  NMR Spectrum of 2a (213-226 ppm).

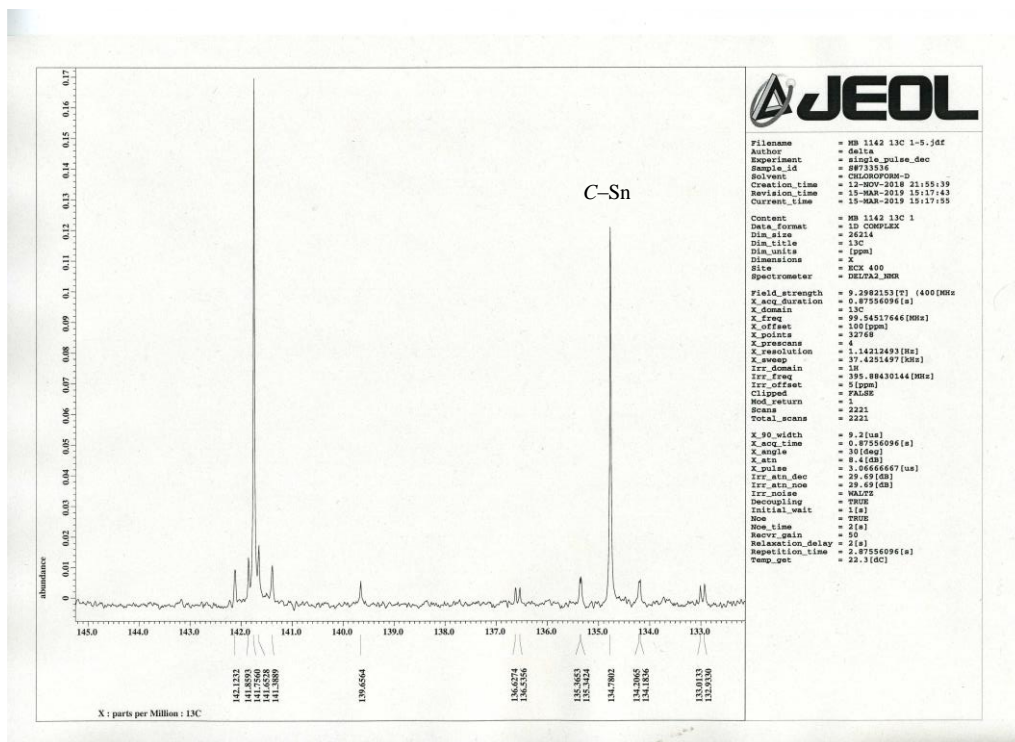

**Fig. S31.** An Enlarged  $^{13}\text{C}$  NMR Spectrum of 2a (132-145 ppm).



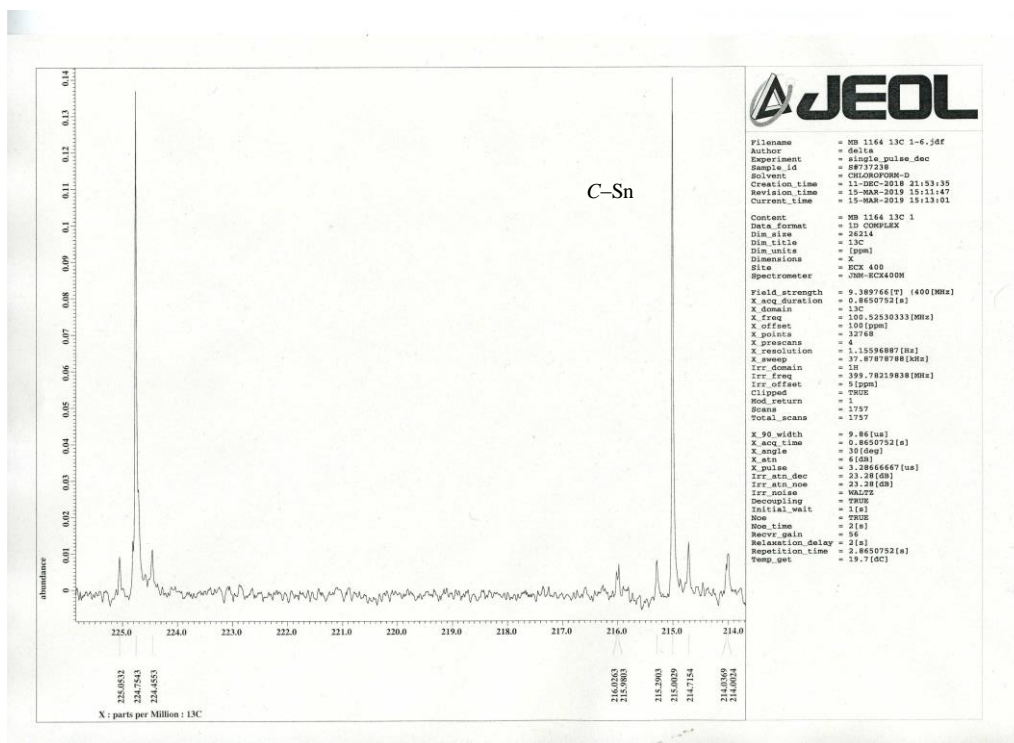

Fig. S32. An Enlarged  $^{13}\text{C}$  NMR Spectrum of **2b** (213-226 ppm).

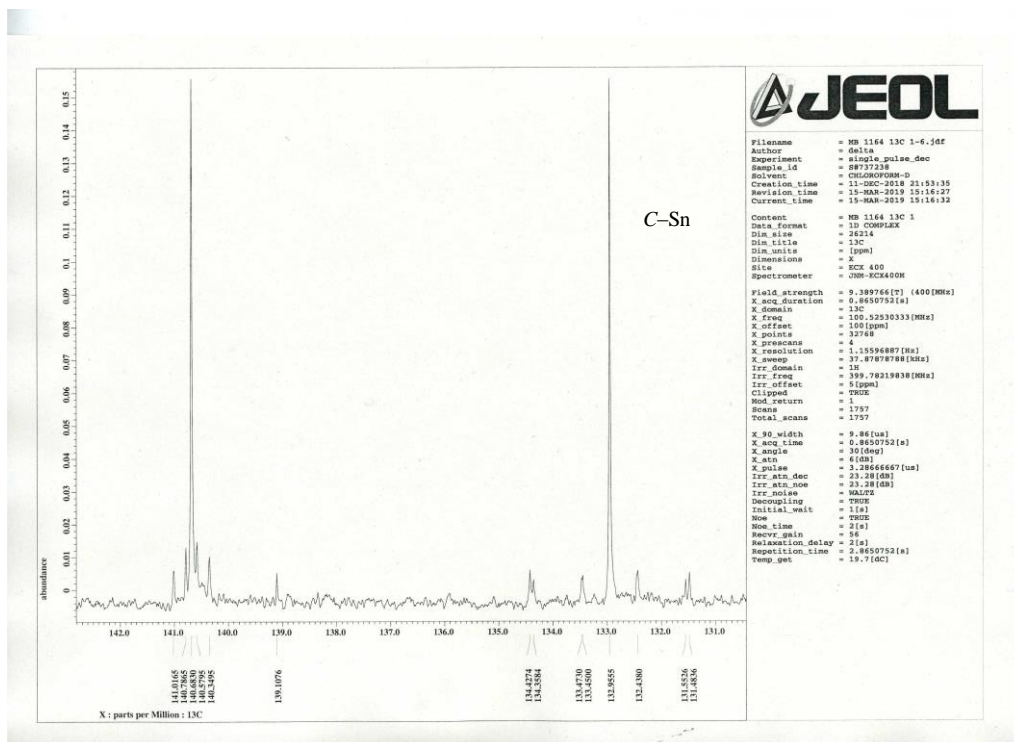

Fig. S33. An Enlarged  $^{13}\text{C}$  NMR Spectrum of **2b** (130-143 ppm).

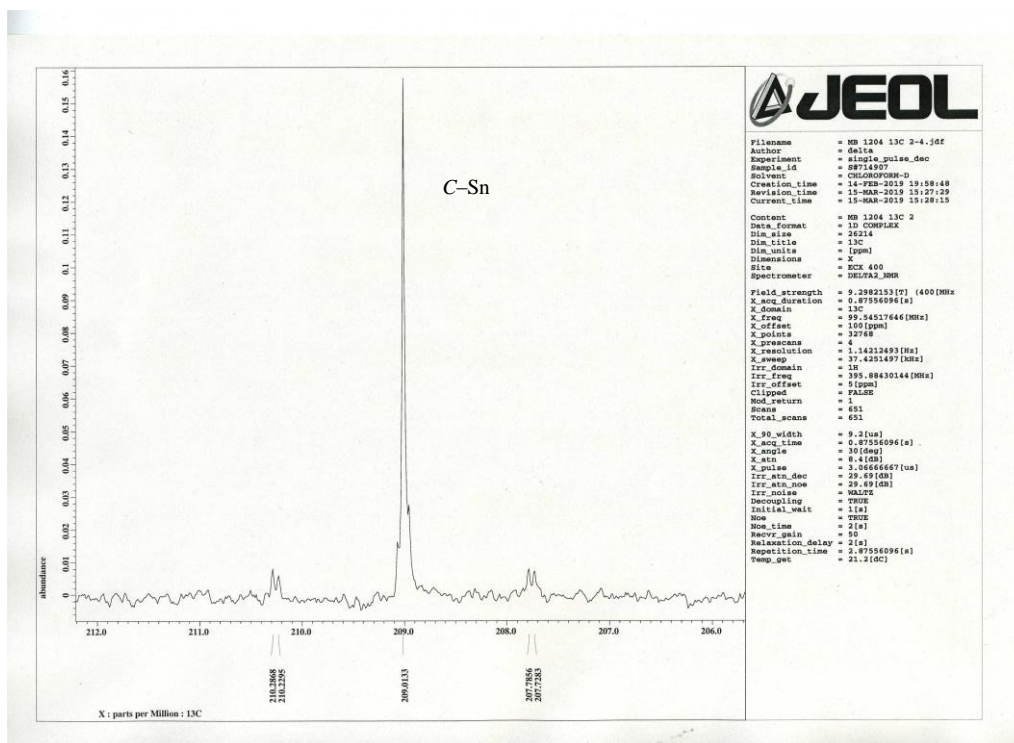

Fig. S34. An Enlarged  $^{13}\text{C}$  NMR Spectrum of **3a** (206-212 ppm).

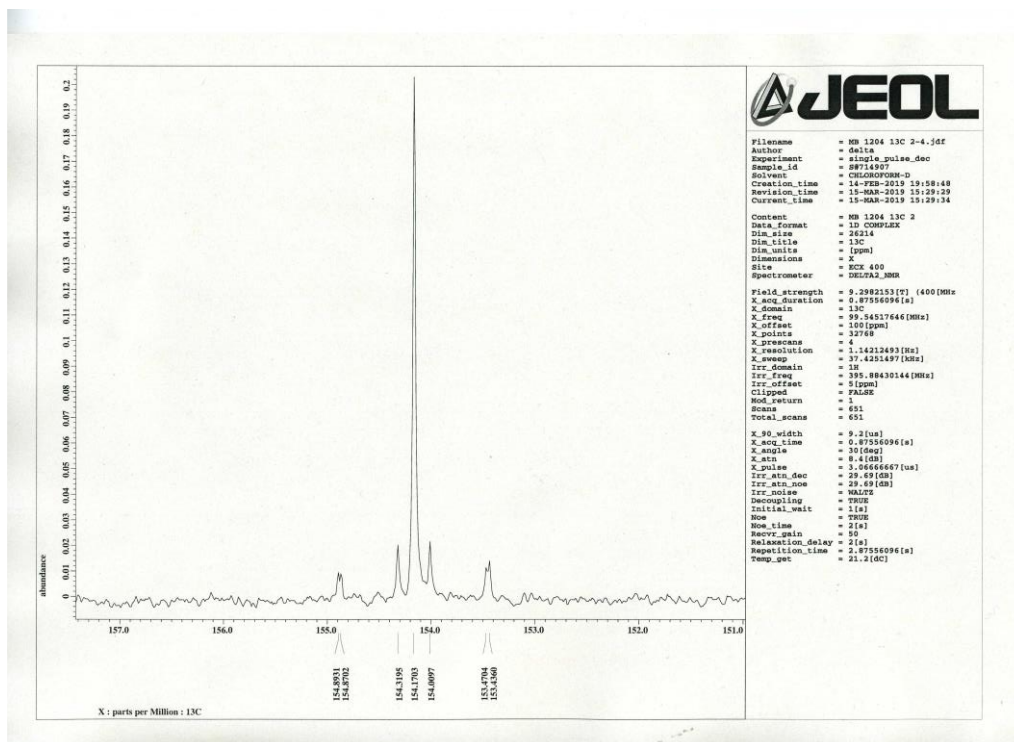

Fig. S35. An Enlarged  $^{13}\text{C}$  NMR Spectrum of **3a** (151-157 ppm).

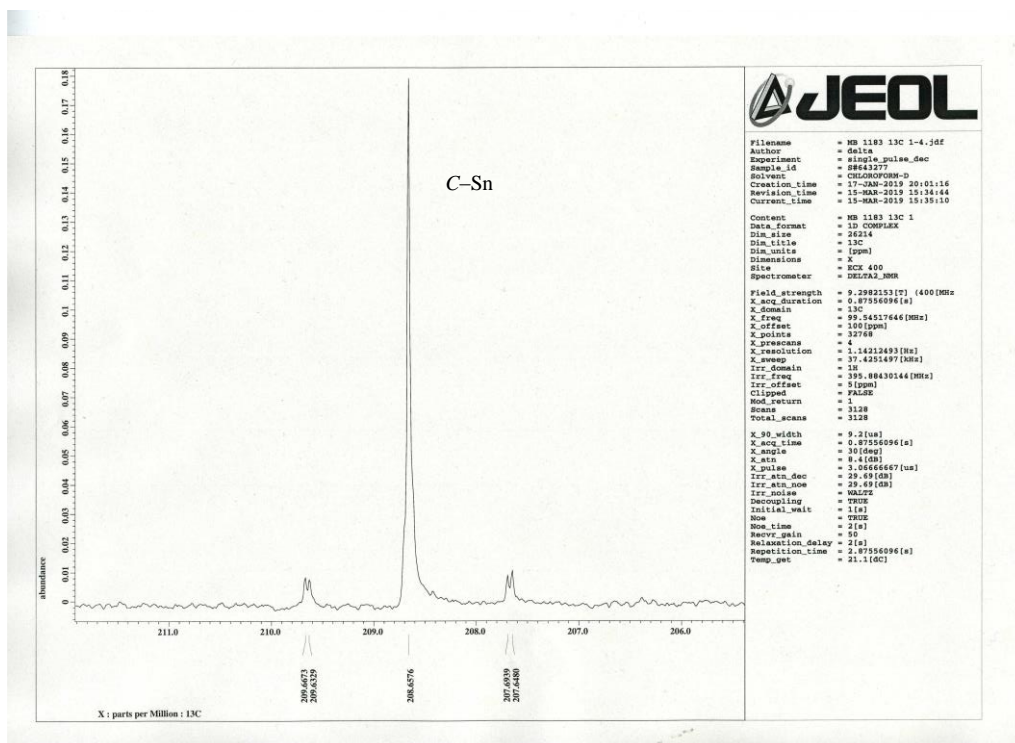

Fig. S36. An Enlarged  $^{13}\text{C}$  NMR Spectrum of **3b** (205-212 ppm).

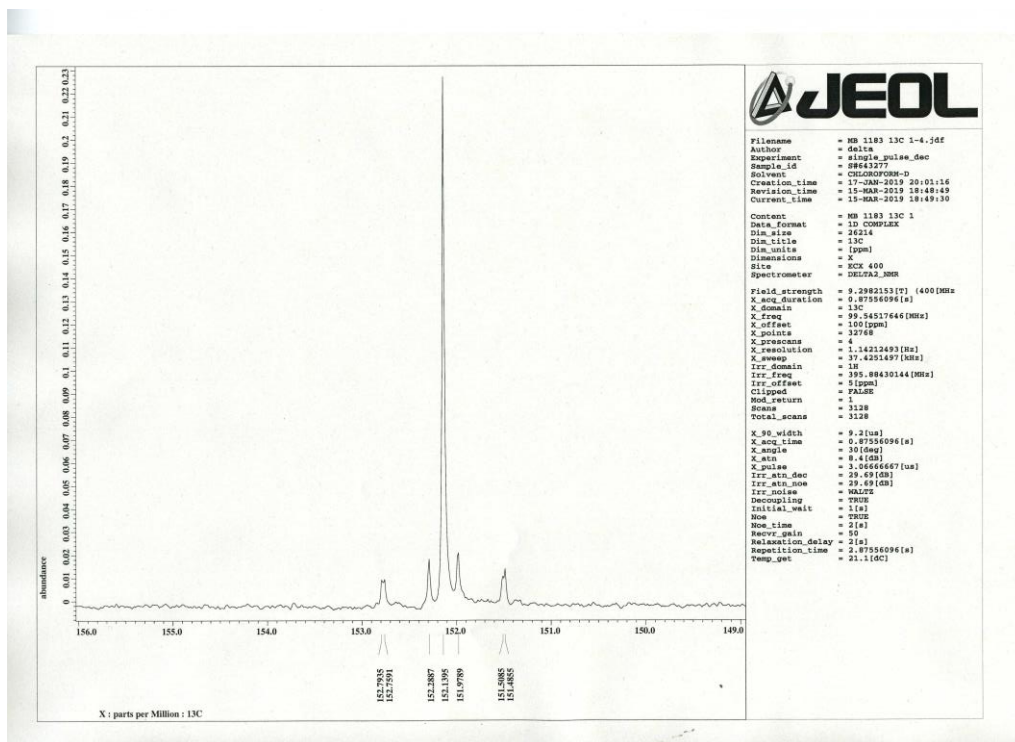

Fig. S37. An Enlarged  $^{13}\text{C}$  NMR Spectrum of **3b** (149-156 ppm).



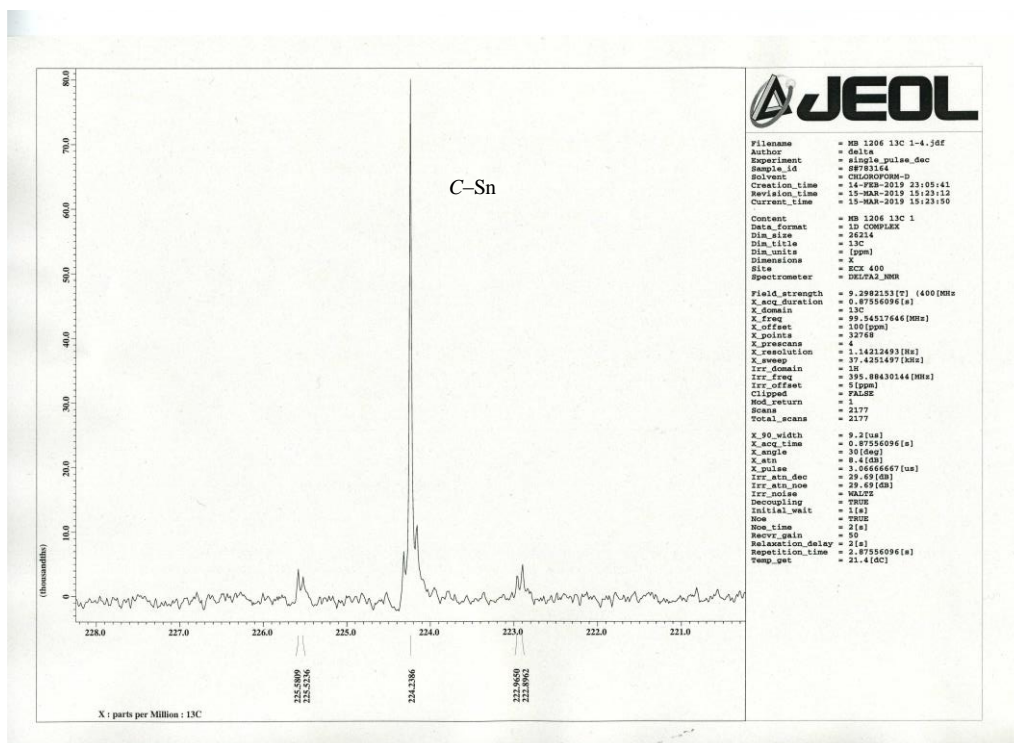

Fig. S38. An Enlarged  $^{13}\text{C}$  NMR Spectrum of **7c** (220-228 ppm).

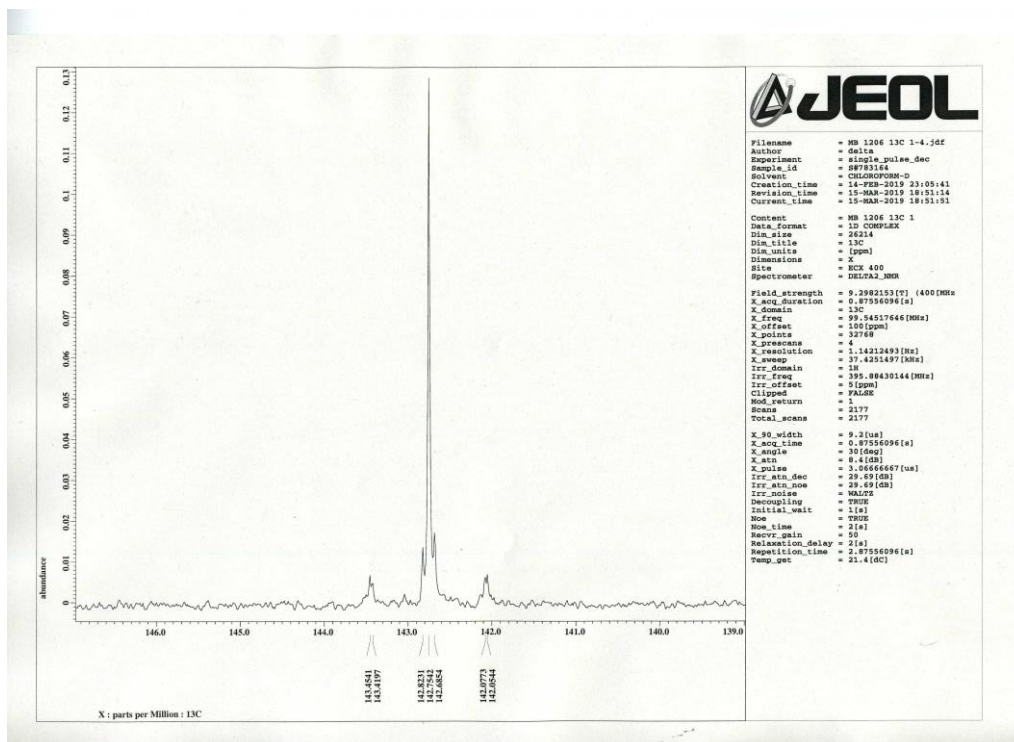

Fig. S39. An Enlarged  $^{13}\text{C}$  NMR Spectrum of **7c** (139-147 ppm).



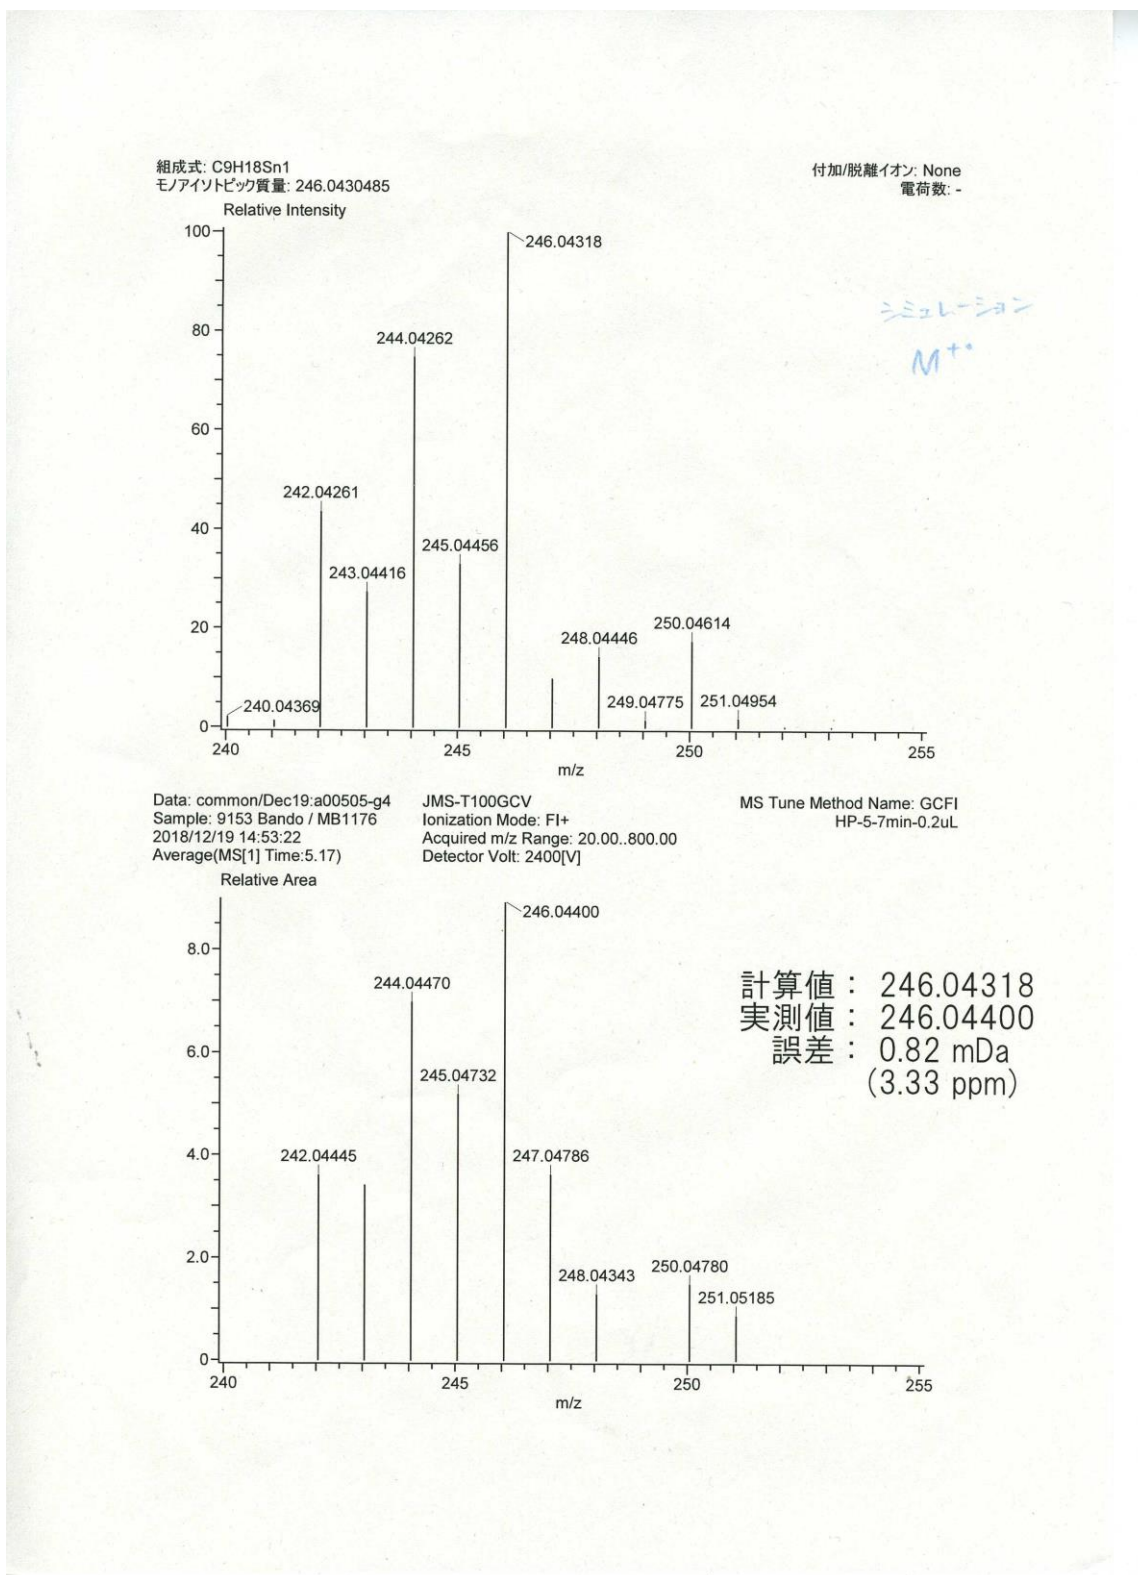

**Fig. S40.** Simulated mass (upper figure) and experimental mass (lower figure) (**1a**).

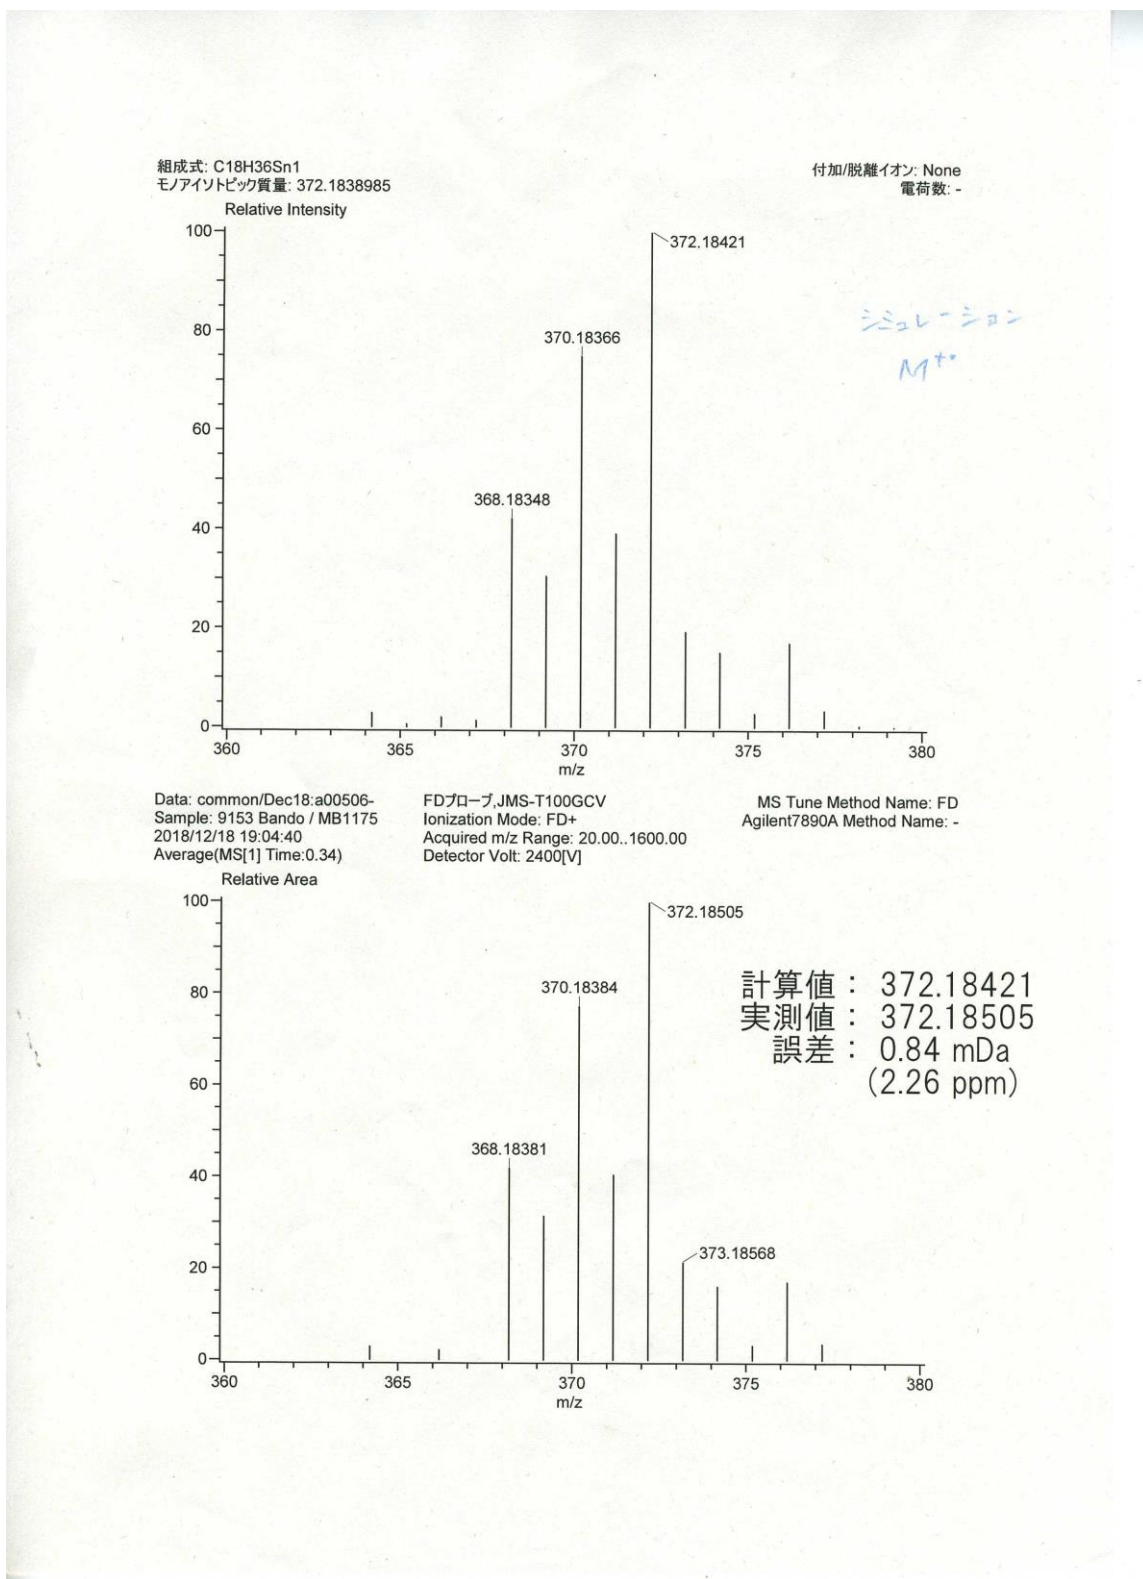

**Fig. S41.** Simulated mass (upper figure) and experimental mass (lower figure) (**1b**).

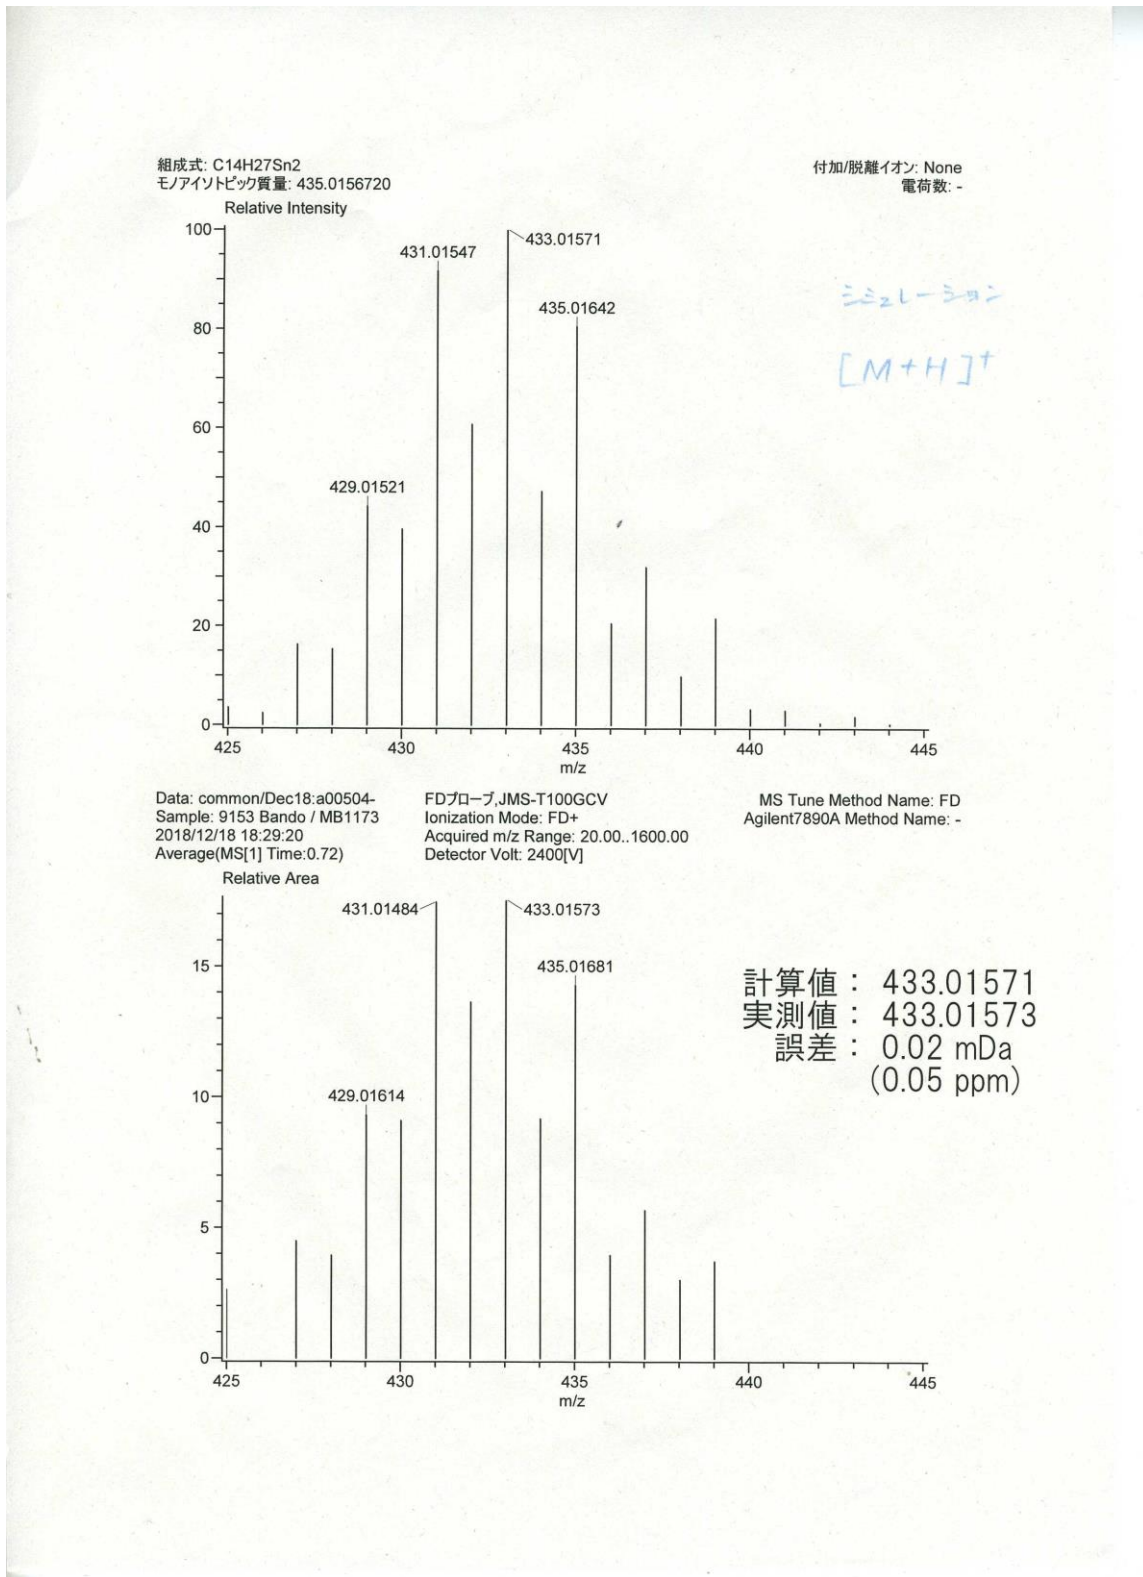

**Fig. S42.** Simulated mass (upper figure) and experimental mass (lower figure) (1c).

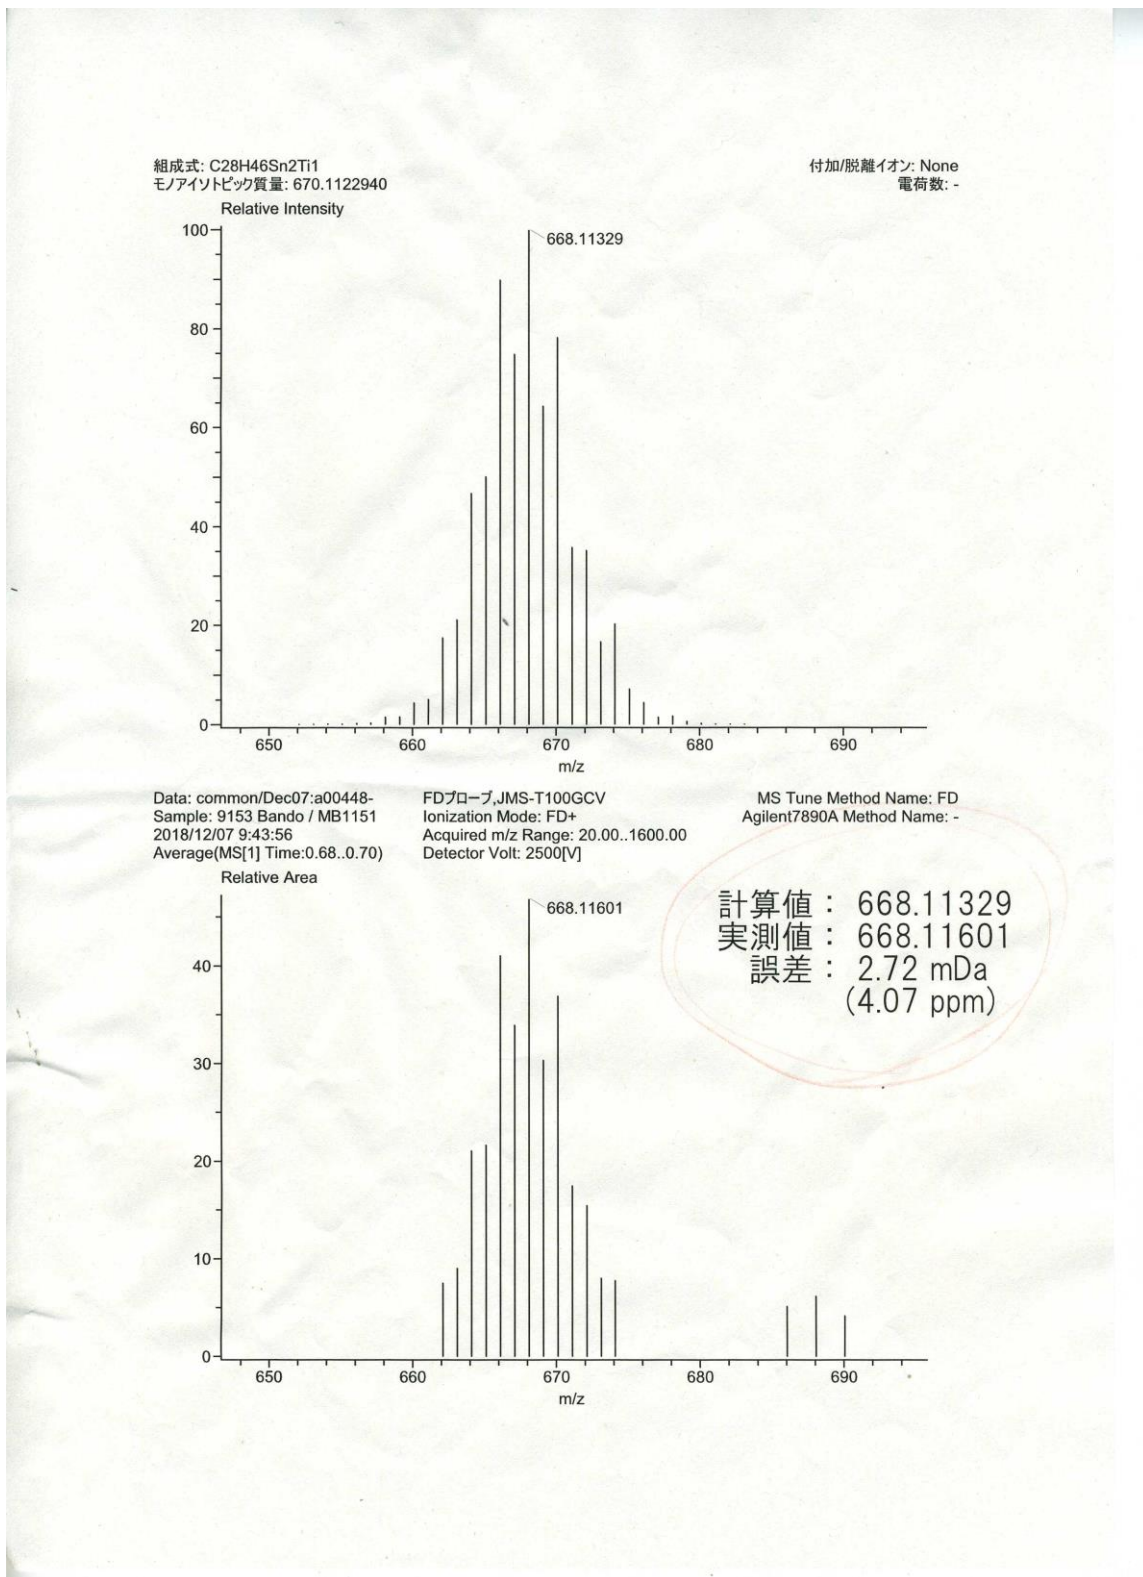

**Fig. S43.** Simulated mass (upper figure) and experimental mass (lower figure) (**2a**).



組成式: C46H82Sn2Ti1  
モノアイソトピック質量: 922.3939940

付加/脱離イオン: None  
電荷数: -

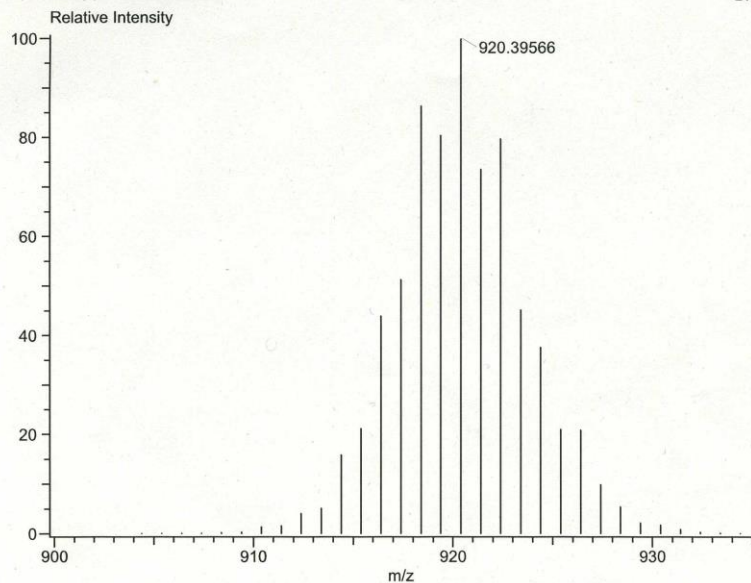

Data: common/Dec13:a00486-2  
Sample: 9153 Bando / MB1164  
2018/12/13 15:25:49  
Average(MS[1] Time:0.56)

FDプローブ,JMS-T100GCV  
Ionization Mode: FD+  
Acquired m/z Range: 20.00..1600.00  
Detector Volt: 2400[V]

MS Tune Method Name: FD  
Agilent7890A Method Name: -

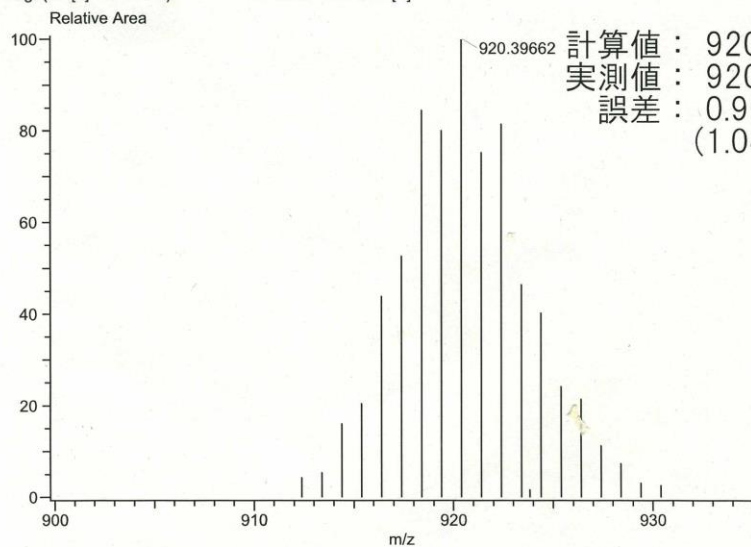

**Fig. S44.** Simulated mass (upper figure) and experimental mass (lower figure) (**2b**).

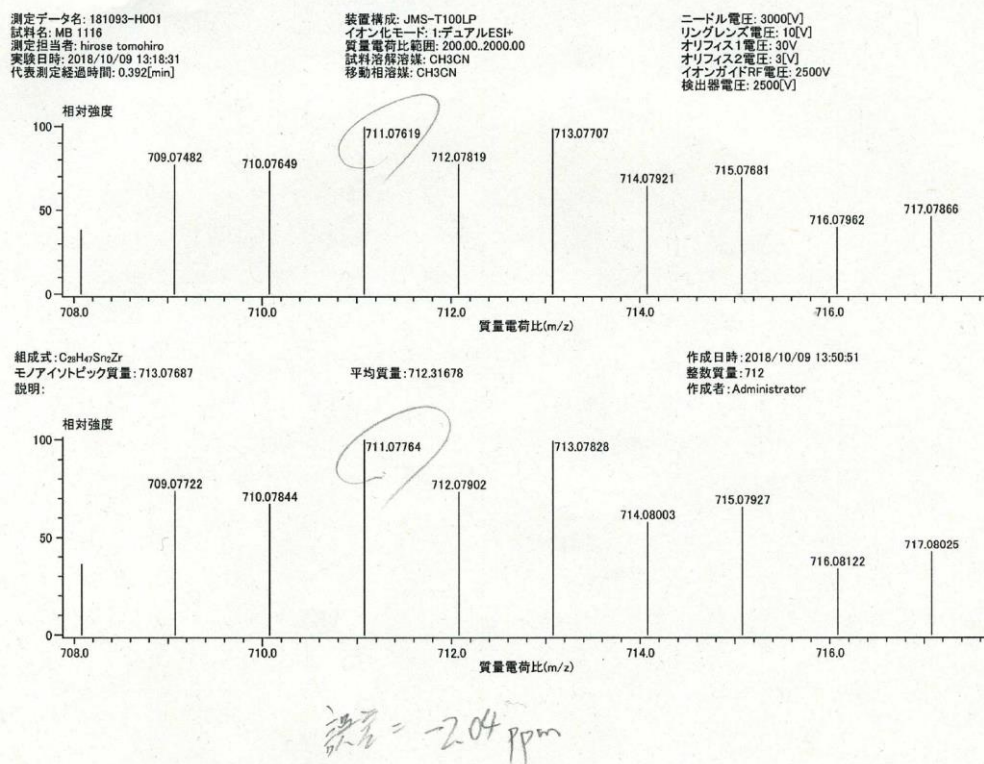

Fig. S45. Simulated mass (lower figure) and experimental mass (upper figure) (3a).

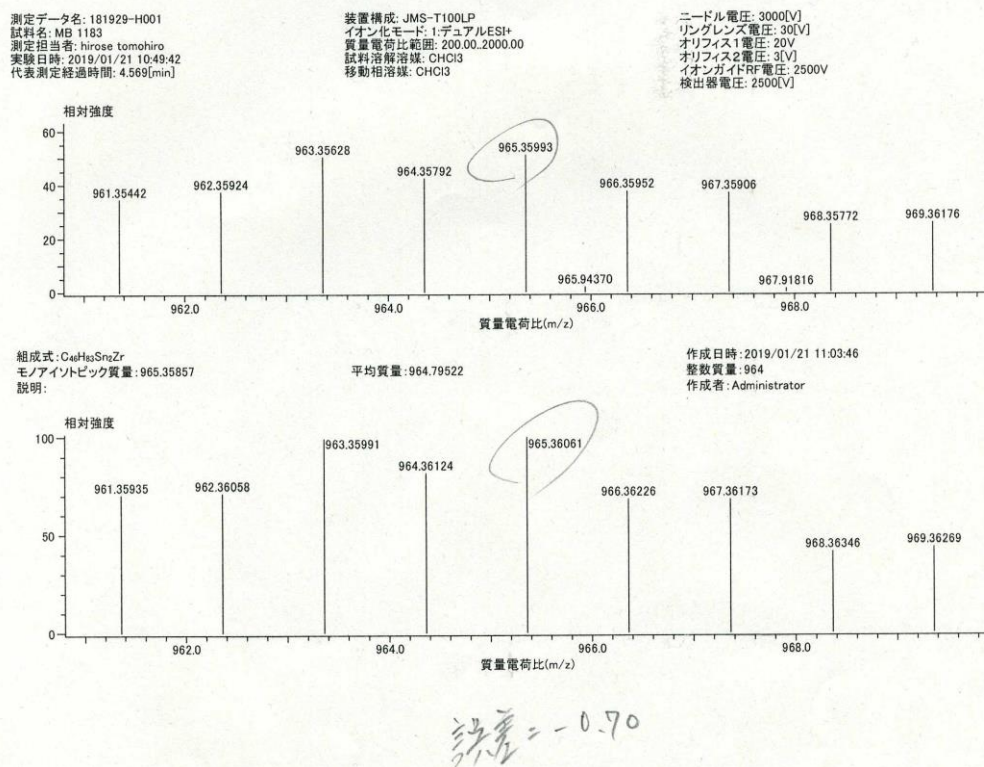

Fig. S46. Simulated mass (lower figure) and experimental mass (upper figure) (3b).

組成式: C<sub>24</sub>H<sub>36</sub>Sn<sub>2</sub>Tl<sub>1</sub>  
モノアイソトピック質量: 612.0340440

付加/脱離イオン: None  
電荷数: -

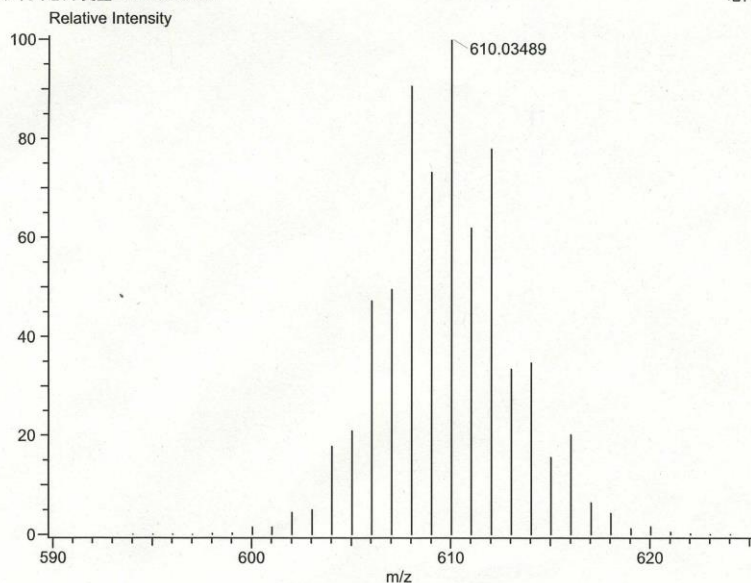

Data: common/Dec13:a00487-2  
Sample: 9153 Bando / MB1168  
2018/12/13 15:25:49  
Average(MS[1] Time:0.56)

FDプローブ,JMS-T100GCV  
Ionization Mode: FD+  
Acquired m/z Range: 20.00..1600.00  
Detector Volt: 2400[V]

MS Tune Method Name: FD  
Agilent7890A Method Name: -

Relative Area

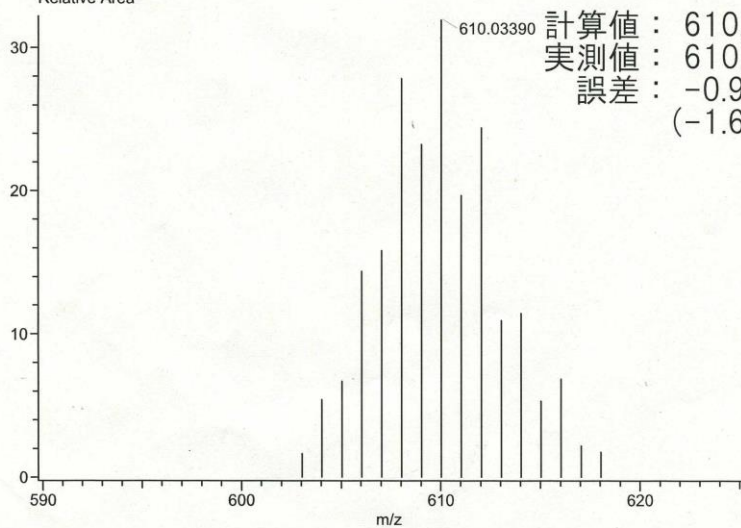

**Fig. S47.** Simulated mass (upper figure) and experimental mass (lower figure) (**7c**).

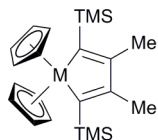

|    | M-C(Cp) | M-C(sp <sup>2</sup> ) | Si-C(sp <sup>2</sup> ) | Si-C(Me) | M-C(sp <sup>2</sup> )-Si | Cent-M-C(sp <sup>2</sup> ) |
|----|---------|-----------------------|------------------------|----------|--------------------------|----------------------------|
| Ti | 2.358   | 2.145                 | 1.871                  | 1.869    | 129.36                   | 105.88                     |
| Zr | 2.51    | 2.246                 | 1.865                  | 1.864    | 128.64                   | 106.64                     |
| Hf | 2.488   | 2.223                 | 1.870                  | 1.863    | 130.05                   | 107.36                     |

**Fig. S48.** Comparison of Bond Distances (Å) and Angles (°) of X-ray Structures.

#### References

M = Ti

This study. CCDC 1900263

M = Zr

M. Westerhausen, M. H. Digeser, C. Gückel, H. Nöth, J. Knizek and W. Ponikwar, *Organometallics*, 1999, **18**, 2491.

M = Hf

M. B. Sabade, M. F. Farona, E. A. Zarate and W. J. Youngs, *J. Organomet. Chem.*, 1988, **338**, 347.
